# Supplementary material
Source: PubMed Central journal article supplement (PMC7042866)
Supplement: jamaneurol-77-561-s001.pdf [file jamaneurol-77-561-s001.pdf]

# 1        **Endovascular Treatment for Acute Basilar Artery Occlusion:** 2                    **a Nationwide Prospective Registry (BASILAR study)**

## 3 4                                    **Study Protocol**

### 5    ***1. Background***

6        The basilar artery is the main blood supply artery of the brainstem, occipital lobe, thalamus  
7        and part of cerebellum. Due to the degree of brain impairment, the clinical symptoms of acute  
8        basilar artery occlusion (BAO) are of great diversity. The mild degree may only have single  
9        cranial nerve palsy and slight hemiplegia and the severe cases may have quadriplegia, lock-in  
10       syndrome and even coma. Acute BAO is a rare but devastating medical conditions accounting  
11       for 1% of all ischemic strokes and 5% of large vessel occlusion strokes<sup>1,2</sup>.

12       In recent years, there are several randomized clinical trials have proved the efficacy of  
13       endovascular treatment (EVT) for acute ischemic stroke with larger vessel occlusion in the  
14       anterior circulation, the benefit of EVT remains uncertain for patients with acute BAO. Since  
15       1996, there have been four randomized control trials, (1) A multicenter, Randomized  
16       Controlled Trial of Intra-Arterial Urokinase in the Treatment of Acute Posterior Circulation  
17       Ischemic Stroke, (2) BASICS (The Basilar Artery International Cooperation Study), (3) BEST  
18       (The Acute Basilar Artery Occlusion: Endovascular Interventions vs. Standard Medical  
19       Treatment Trial) and (4) BAOCHE (Basilar Artery Occlusion: Chinese Endovascular Trial),  
20       aiming to investigate the benefit of EVT plus usual care versus usual care alone in acute  
21       BAO<sup>3-5</sup>. To our knowledge, the first trial has been terminated prematurely because of poor  
22       recruitment. The other trials are facing the question of whether these trials will achieve its  
23       inclusion target, mainly because some comprehensive stroke centers are unwilling to include  
24       cases after the many positive results of trials for endovascular therapy in patients with anterior  
25       circulation stroke. The Basilar Artery International Cooperation Study (BASICS) was a  
26       prospective registry which enrolled 619 patients range from Nov. 2002 to Oct. 2007, which  
27       did not demonstrate superiority of EVT over usual care (25.7% vs. 38.2%)<sup>6</sup>. In 2015, the

28 ENDOSTROKE study suggested that 42% of the acute BAO patients can achieve good  
29 functional outcomes from EVT and a recent retrospective study shown that proportion was 50%  
30 which indicated EVT is an efficacy treatment for acute BAO<sup>7,8</sup>. However, these studies have  
31 several limitations. First, BASICS study was conducted a decade ago and used outdated EVT  
32 techniques and devices. Second, recent studies were single arm, small sample size  
33 retrospective studies. In conclusion, these findings are unable to clarify the role of EVT for  
34 acute BAO.

35 We conducted this nationwide, prospective registry (BASILAR study) to investigate the  
36 efficacy and safety of EVT for acute BAO. This study had been registered on the website,  
37 Chinese Clinical Trial Registry (<http://www.chictr.org.cn/index.aspx>) (Registration No.  
38 ChiCTR1800014759).

39

## 40 ***2.Methods***

### 41 ***2.1.Study Design***

42 The BASILAR study is a nationwide, prospective registry of consecutive patients presenting  
43 with a symptomatic and radiologically confirmed acute BAO. The main purpose of the  
44 BASILAR study is to evaluate the efficacy and safety of modern EVT plus standard medical  
45 treatment (SMT) versus SMT alone in acute BAO within 24 hours of estimated occlusion  
46 time. The target number of patients included in the registry is about 800. The study was  
47 designed by the principal investigators and experts in cerebrovascular diseases and  
48 interventional neuroradiology. The BASILAR study protocol has been approved by the ethics  
49 committee of the Xinqiao hospital, Army Medical University, Chongqing, China and each  
50 participating center. The study flow chart was shown in Figure 1.

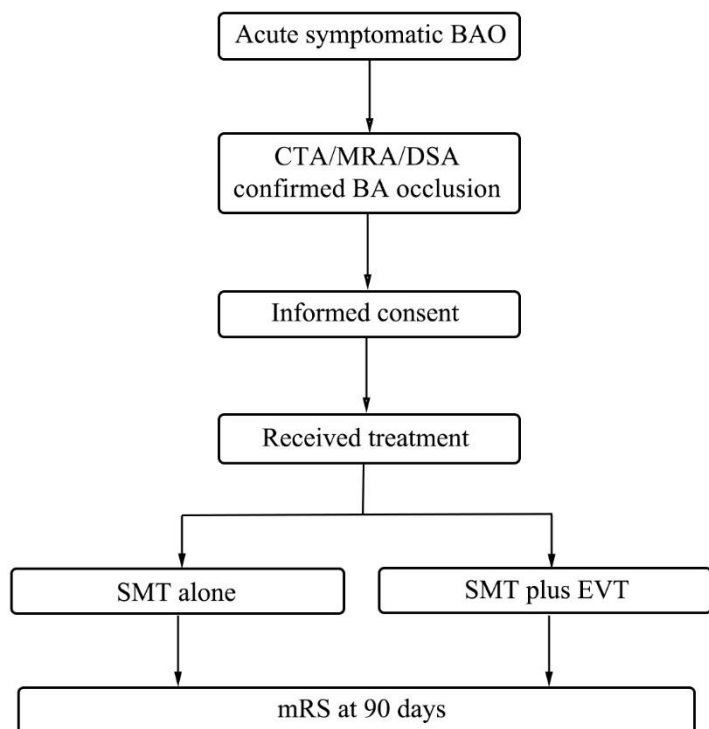

51  
52 Figure 1. The BASILAR study flowchart. SMT denotes standard medical treatment, EVT  
53 endovascular treatment.

54

## 55 **2.2.Subjects selection**

### 56 **2.2.1.Inclusion criteria**

57 Patients can be enrolled in the study if they fulfilled the following criteria:

- 58 1) age  $\geq 18$  years;
- 59 2) within 24h of estimated time of BAO. Estimated time of BAO is defined as time of onset  
60 of acute symptoms consistent with the clinical diagnosis of BAO or if not known last time  
61 patient was seen normal prior to onset of these symptoms;
- 62 3) BAO confirmed by computed tomographic angiography (CTA) /magnetic resonance  
63 angiography (MRA) /digital subtraction angiography (DSA);
- 64 4) initiation of intravenous (IV) recombinant tissue plasminogen activator (rt-PA) within 4.5  
65 hours or IV urokinase within 6 hours of estimated time of BAO;
- 66 5) initiation of EVT for patients within 24 hours of estimated time of BAO;
- 67 6) informed consent.

68

### 69 **2.2.2.Exclusion criteria**

70 Patients will be excluded from the study in case of:

71 1) pre-existing dependency with a modified Rankin Scale (mRS)  $\geq 3$ ;

72 2) neuroimaging evidence of cerebral hemorrhage on presentation;

73 3) patients without follow-up information;

74 4) currently in pregnant or lactating;

75 5) serious, advanced or terminal illness;

76 6) incomplete baseline critical data (e.g., imaging and time points).

77

### 78 **2.3.Participating center eligibility**

79 To avoid selection bias, all centers were obliged to enter all consecutive patients in the study.

80 To be fully eligible for participation in this study, study site selection had to meet the  
81 following minimum criteria: (1) all study centers were required to have performed at least 30  
82 endovascular procedures annually, including at least 15 thrombectomy procedures with the  
83 stent–retrieval devices; (2) all intervention teams were certified interventionists for EVT on  
84 large artery occlusion.

85

### 86 **2.4.Treatments**

87 Patients were divided into SMT alone group (control group) or SMT plus EVT group (EVT  
88 group) according to the treatment they received.

89 The control group received SMT alone, e.g. intravenous thrombolysis (IVT) with rt-PA or  
90 urokinase, antiplatelet drugs, systematic anticoagulation, or combinations of these medical  
91 treatments, as described in the guidelines for the management of AIS<sup>9</sup>.

92 Patients in the EVT group underwent SMT as described previously plus EVTs which  
93 comprised mechanical thrombectomy, thromboaspiration, balloon dilation, stenting, IAT, or  
94 various combinations of these approaches. The mechanical thrombectomy may consist of  
95 thrombus retraction, aspiration or use of a stent retriever device. Generally, solitaire FR

96 (Medtronic Neurovascular, Irvine, CA), Trevo (Stryker neurovascular, Fremont, CA) or other  
97 newly developed devices approved by National Medical Products Administration (NMPA)  
98 were considered in the present study. Both intravenous sedation and general anesthesia can be  
99 considered to ensure the safety of patients. Re-occlusion often occurred after thrombectomy  
100 in atherosclerotic disease, therefore, rescue therapy including balloon dilation, stenting,  
101 intra-arterial thrombolysis, and glycoprotein Iib/IIIa inhibitor (GPI) might be utilized to  
102 retrieve recanalization. After recanalization of the target artery, most of the patients were  
103 transferred to the neuro-intensive care unit for at least 24 hours with their systolic blood  
104 pressure maintained at 120-140mmHg. Additionally, the patients who underwent extracranial  
105 or intracranial stent implantation were prescribed antithrombotic medication to prevent acute  
106 stent thrombosis. For the patients without prior IVT, loading doses of clopidogrel (300 mg)  
107 and aspirin (300 mg) were given, or a low dose of GPI was bolus-injected intra-arterially and  
108 maintained for at least 24 hours, while for those with prior IVT, clopidogrel (75 mg) and  
109 aspirin (100 mg) were given after 24 hours of IVT, then all the patients were given  
110 clopidogrel (75 mg/d) and aspirin (100 mg/d) for 1-3 months.

111

### 112 ***2.5.Follow-up***

113 At 24 hours, a clinical examination including the National Institutes of Health Stroke Scale  
114 (NIHSS) and Glasgow Coma Scale (GCS) will be carried out. At 48 hours, patients will  
115 undergo CTA or MRA imaging to evaluate the recanalization rate and CT to assess the  
116 cerebral hemorrhage. At one-week, clinical status, NIHSS score, GCS score, and adverse  
117 events will be reported. At 90 days, mRS will be recorded.

118

### 119 ***2.6.Endpoints***

#### 120 ***2.6.1.Primary efficacy outcome***

121 The primary efficacy outcome is the score on the mRS at 90 days.

122

#### 123 ***2.6.2.Secondary efficacy outcomes***

124 The secondary clinical efficacy outcomes were the rate of favorable functional outcomes  
125 (defined as mRS  $\leq$  3) at 90 days, and the change of the NIHSS score at 24 hours and at 5-7  
126 days or discharge if earlier from baseline. The technical efficacy outcomes regarding  
127 recanalization were substantial reperfusion, as assessed by means of catheter angiography in  
128 the EVT group and defined as a modified Treatment in Cerebral Infarction score of 2b (50 to  
129 99% reperfusion) or 3 (complete reperfusion).

130

### 131 ***2.6.3.Safety outcomes***

132 Safety outcomes were the mortality at 90 days, symptomatic intracerebral hemorrhage (sICH)  
133 at 48 hours, procedure-related complications (e.g., arterial perforation, arterial dissection, and  
134 embolization in a previously uninvolved vascular territory), and serious adverse events.

135

### 136 ***2.7.Blinding***

137 All those involved in the subsequent clinical and imaging assessment of outcomes will be  
138 blinded to treatment allocation.

139

### 140 ***2.8.Imaging core laboratory***

141 Centralized imaging core labs will be used in this study to provide consistent evaluation of  
142 images. The imaging core laboratory evaluated the findings on baseline non-contrast CT for  
143 the posterior circulation- Alberta Stroke Program Early CT Score (pc-ASPECTS), baseline  
144 vessel imaging (CTA, MRA, or DSA) for the location of the occlusion, angiographic  
145 outcomes on DSA imaging for technical efficacy outcomes regarding recanalization,  
146 follow-up CTA or MRA within 48 hours for vessel recanalization, and the follow-up CT for  
147 the presence of intracerebral hemorrhage. All neuroimaging studies were evaluated by two  
148 neuroradiologists independently with blindness of the treatment allocation, clinical data, and  
149 outcomes. For cases with disagreement, decisions were made by the third experienced  
150 neuroradiologist.

151

152 **2.9. Clinical events committee**

153 The clinical events committee will be comprised of three expert physicians who are  
154 independent of the investigational sites. This committee will be responsible for the review and  
155 validation of all complications that occur over the course of the study and the subsequent  
156 classification of these complications as related to the device or procedure.

157 Members of the clinical events committee will review all complications and adjudicate them  
158 as defined in the adverse event section in the clinical events committee manual of operations.

159 The clinical events committee can request additional source documentation and any imaging  
160 obtained in support of the adverse event to assist with adjudication.

161

162 **2.10. Statistical analyses**

163 Statistical analysis is performed using SPSS 23 (IBM SPSS Statistics). Baseline  
164 characteristics will be summarized by means of simple descriptive statistics. The main  
165 analysis of this study consists of a comparison of the primary outcome after 90 days between  
166 two treatment groups. The primary effect parameter takes the whole range of the mRS into  
167 account and is defined as the relative risk for improvement on the mRS. It is estimated as a  
168 common odds ratio with ordinal logistic regression. In this primary analysis, multivariable  
169 regression analysis will be used to adjust for main prognostic variables between EVT and  
170 control group, such as age, baseline NIHSS, baseline pc-ASPECTS, onset to imaging  
171 diagnosis time, sex, diabetes mellitus, ischemic stroke, intravenous thrombolysis, and location  
172 of occlusion. Accordingly, treatment effect modification will be explored in subgroups  
173 defined by (tertiles of) age, sex, NIHSS score at the time of treatment, pc-ASPECTS, site of  
174 occlusion, time from onset to imaging diagnosis, and intravenous thrombolysis. Secondary  
175 effect parameters will be the improvement according to the classic dichotomizations of the  
176 mRS scale at 0-1 vs. 2-6, 0-2 vs. 3-6, and 0-3 vs. 4-6, the change of the NIHSS score at 24  
177 hours and at 5-7 days or discharge if earlier from baseline. For the analysis of the secondary  
178 outcomes, simple 2 \* 2 tables, two-group t-tests, Mann-Whitney U tests, and multivariable

179 linear and logistic regression models will be used, where appropriate. In all analyses,  
180 statistical uncertainty will be expressed by means of 95% CI.

181 We perform a 1:1 and/or 1:2 propensity score matching (PSM) analysis based on the  
182 nearest-neighbor matching algorithm with a caliper width of 0.2 of the propensity score with  
183 main prognostic variables as covariates<sup>10</sup>. After matching, we use property methods to test the  
184 differences between two groups. Furthermore, supportive analyses use the propensity score,  
185 compute based on an ordinal logistic regression model accounting for additional explanatory  
186 variables. Significance level is set to  $P < 0.05$ , and all tests of hypotheses are two-sided.

187

### 188 ***3. Study personnel***

#### 189 ***3.1. Principal Investigator***

190 Qingwu Yang, Raul Gomes Nogueira

191

#### 192 ***3.2. Executive committee***

193 Chengsong Yue, Jun Yang, Weidong Luo, Shuai Liu, Pengxiao Yu, Luming Chen, Dongjing  
194 Xie, Fei Gao, Jiaying Song, Chenhao Zhao, Junjie Yuan, Guoqiang Yang, Jiacheng Huang,  
195 Hongfei Sang, Meng Zuo; Yonggang Hao, Ting Hu, Meng Liang, Feng Peng, Xiaoyun Liu,  
196 Shun Li

197

#### 198 ***3.3. Steering committee***

199 Qingwu Yang, Raul Gomes Nogueira, Wenjie Zi, Zhongming Qiu, Deping Wu, Fengli Li,  
200 Hansheng Liu, Zili Gong, Jie Shuai

201

#### 202 ***3.4. Clinical events committee***

203 Fan Deng, Dan Liu, Shengya Zeng

204

#### 205 ***3.5. Imaging assessment committee***

206 Dong Zhang, Hua Yang, Fajin Lv



207

208 **3.6. Outcome assessment committee**

209 Zhangbao Guo, Min Zhang, Jiaming Cao, Zhizhong Yan, Shuai Zhang, Zhiguo Li,  
210 Dongzhang Xue, Fanghui Bai, Hongxing Han, Xianjun Wang, Guozhong Niu, Hao Zhang,  
211 Kuihua Wang, Wei He, Tieqiao Feng, Wentong Ling, Kui Lu, Yi Zhang, Sizhi Tang,  
212 Hongliang Zeng, Jianzhou Wu, Ling Tian, Xuan Liu, Zetao Shao, Yong Liu, Shu Yang, Jun  
213 Zhang, Lin Chen, Haitao Guan, Qian Yang, Qiang Shi, Renliang Meng, Xianhui Ding, and  
214 Zili Gong.

215

216 **3.7. PhD-students and study coordinators**

217 Chengsong Yue, Jun Yang, Weidong Luo, Shuai Liu, Pengxiao Yu, Luming Chen, Dongjing  
218 Xie, Fei Gao, Jiaying Song, Chenhao Zhao, Junjie Yuan, Guoqiang Yang, Jiacheng Huang,  
219 Hongfei Sang, Meng Zuo, Yonggang Hao, Ting Hu, Meng Liang, Feng Peng, Xiaoyun Liu,  
220 and Shun Li.

221 All these students' affiliation is Department of Neurology, Xinqiao Hospital and The Second  
222 Affiliated Hospital, Army Medical University (Third Military Medical University),  
223 Chongqing, China.

224

225 **3.8. Study statisticians**

226 Duolao Wang, Dong Yi

227

228 **4. References**

- 229 1. Smith WS, Lev MH, English JD, et al. Significance of large vessel intracranial occlusion causing acute  
230 ischemic stroke and TIA. *Stroke*. 2009;40(12):3834-3840.
- 231 2. Mattle HP, Arnold M, Lindsberg PJ, Schonewille WJ, Schroth G. Basilar artery occlusion. *The Lancet*  
232 *Neurology*. 2011;10(11):1002-1014.
- 233 3. Macleod MR, Davis SM, Mitchell PJ, et al. Results of a multicentre, randomised controlled trial of  
234 intra-arterial urokinase in the treatment of acute posterior circulation ischaemic stroke. *Cerebrovascular*  
235 *diseases (Basel, Switzerland)*. 2005;20(1):12-17.

- 236 4. Liu X, Xu G, Liu Y, et al. Acute basilar artery occlusion: Endovascular Interventions versus Standard  
237 Medical Treatment (BEST) Trial-Design and protocol for a randomized, controlled, multicenter study.  
238 *Int J Stroke*. 2017;12(7):779-785.
- 239 5. van der Hoeven EJ, Schonewille WJ, Vos JA, et al. The Basilar Artery International Cooperation Study  
240 (BASICS): study protocol for a randomised controlled trial. *Trials*. 2013;14:200.
- 241 6. Schonewille WJ, Wijman CA, Michel P, et al. Treatment and outcomes of acute basilar artery occlusion  
242 in the Basilar Artery International Cooperation Study (BASICS): a prospective registry study. *The*  
243 *Lancet Neurology*. 2009;8(8):724-730.
- 244 7. Singer OC, Berkefeld J, Nolte CH, et al. Mechanical recanalization in basilar artery occlusion: the  
245 ENDOSTROKE study. *Annals of neurology*. 2015;77(3):415-424.
- 246 8. van Houwelingen RC, Luijckx GJ, Mazuri A, Bokkers RP, Eshghi OS, Uyttenboogaart M. Safety and  
247 Outcome of Intra-Arterial Treatment for Basilar Artery Occlusion. *JAMA neurology*.  
248 2016;73(10):1225-1230.
- 249 9. Powers Wj Fau - Derdeyn CP, Derdeyn Cp Fau - Biller J, Biller J Fau - Coffey CS, et al. 2015 American  
250 Heart Association/American Stroke Association Focused Update of the 2013 Guidelines for the Early  
251 Management of Patients With Acute Ischemic Stroke Regarding Endovascular Treatment: A Guideline  
252 for Healthcare Professionals From the American Heart Association/American Stroke Association.  
253 *Stroke*. 2015;46(1524-4628 (Electronic)):16.
- 254 10. Kurth T, Walker AM, Glynn RJ, et al. Results of multivariable logistic regression, propensity matching,  
255 propensity adjustment, and propensity-based weighting under conditions of nonuniform effect. *Am J*  
256 *Epidemiol*. 2006;163(3):262-270.

257
