# Supplementary material
Source: PubMed Central journal article supplement (PMC7042866)
Supplement: jamaneurol-77-561-s002.pdf [file jamaneurol-77-561-s002.pdf]

## Supplementary Online Content

Writing Group for the BASILAR Group. Assessment of Endovascular Treatment for Acute Basilar Artery Occlusion via a Nationwide Prospective Registry. *JAMA Neurol.* Published February 20, 2020. doi:10.1001/jamaneurol.2020.0156

**eMethods 1.** Propensity Matching Score Analysis

**eMethods 2.** Treatment method

**eMethods 3.** Definition of sICH and aICH

**eTable 1.** Ordinal regression model of primary outcome based on PSM dataset including the propensity score as a covariate

**eTable 2.** Multivariate regression models of outcomes based on the full dataset including the propensity score as a covariate

**eTable 3.** Data elements in the BASILAR cohort study

**eTable 4.** Participating centers and eligible patients

**eFigure 1.** Consort flow diagram of the BASILAR study

**eFigure 2.** Distribution of the BASILAR study centers on the map of China

**eFigure 3.** Horizontal stacked bar graphs of mRS outcome by key co-variables in all subjects. Distribution of modified Rankin Scale score at 90 days of all subjects with age  $\geq 65$  years vs.  $< 65$  years. Threshold for age was chosen at the median. EVT denotes endovascular treatment.

**eFigure 4.** Distribution of modified Rankin Scale score at 90 days of all subjects stratified by sex

**eFigure 5.** Distribution of modified Rankin Scale score at 90 days of all subjects with stratified by baseline NIHSS ( $\geq 27$  or  $< 27$ ).

**eFigure 6.** Distribution of modified Rankin Scale score at 90 days of all subjects with baseline pc-ASPECTS  $< 8$  vs.  $\geq 8$ .

**eFigure 7.** Distribution of modified Rankin Scale score at 90 days of all subjects stratified by TOAST subtype (large artery atherosclerosis (LAA) or cardiac embolism (CE) or other).

**eFigure 8.** Distribution of modified Rankin Scale score at 90 days of all subjects stratified by occlusion site (BA distal or BA middle or BA proximal or VA-V4).

**eFigure 9.** Distribution of modified Rankin Scale score at 90 days of all subjects stratified by occlusion site (BA middle or non BA middle).

**eFigure 10.** Distribution of modified Rankin Scale score at 90 days of all subjects with time from stroke onset to imaging diagnosis (OTI)  $\leq 360$  min vs.  $> 360$  min.

**eFigure 11.** Distribution of modified Rankin Scale score at 90 days of all subjects stratified by intravenous thrombolysis (IVT).

**eFigure 12.** Horizontal stacked bar graphs of mRS outcome by key co-variables in the propensity score matching (PSM) dataset Distribution of modified Rankin Scale score at 90 days of the patients in the PSM dataset with age  $\geq 65$  years vs.  $< 65$  years.

**eFigure 13.** Distribution of modified Rankin Scale score at 90 days of the patients in the PSM dataset stratified by sex.

**eFigure 14.** Distribution of modified Rankin Scale score at 90 days of the patients in the PSM dataset with stratified by baseline NIHSS ( $\geq 26$  or  $< 26$ ).

**eFigure 15.** Distribution of modified Rankin Scale score at 90 days of the patients in the PSM dataset with baseline pc-ASPECTS < 8 vs. ≥ 8.

**eFigure 16.** Distribution of modified Rankin Scale score at 90 days of the patients in the PSM dataset stratified by TOAST subtype (large artery atherosclerosis (LAA) or cardiac embolism (CE) or other).

**eFigure 17.** Distribution of modified Rankin Scale score at 90 days of the patients in the PSM dataset stratified by occlusion site (BA distal or BA middle or BA proximal or VA-V4).

**eFigure 18.** Distribution of modified Rankin Scale score at 90 days of the patients in the PSM dataset stratified by occlusion site (BA middle or non BA middle).

**eFigure 19.** Distribution of modified Rankin Scale score at 90 days of the patients in the PSM dataset with time from stroke onset to imaging diagnosis (OTI) ≤ 360 min vs. > 360 min.

**eFigure 20.** Distribution of modified Rankin Scale score at 90 days of the patients in the PSM dataset stratified by intravenous thrombolysis (IVT).

**eReferences.**

This supplementary material has been provided by the authors to give readers additional information about their work.

### eMethods 1. Propensity Matching Score Analysis

We performed a 1:1 propensity score matching based on the nearest-neighbor matching algorithm with a caliper width of 0.2 with the usage of SPSS 23.0 (IBM SPSS Statistics)<sup>1</sup>. Nine patients were excluded: 6 patients lack of baseline ASPECTS score and 3 patients had no systolic blood pressure value. The variables, parameter settings and results are listed as follows:

```
/VARS
  ID = order
  TREAT = group
  COVS = age SBP baseline ASPECTS smoking TOAST baseline NIHSS
  ADDLCOVS = hyperlipidemia diabetes mellitus ischemic stroke
  EXACT = Occlusion Sites
/MATCHIT
  MATCH=NEAREST
  EST =LOGIT
  DISCARD = NONE
  MORDER = LARGEST
  RATIO = 1
  CALIPER = .2
/PLOT HISTPLOT JITTERPLOT HISTBAL DOTPLOT INDBAL RESOLUTION = 96
/OUTPUT ALL WIDE.
```

| Sample Sizes |         |         |
|--------------|---------|---------|
|              | Control | Treated |
| All          | 180     | 640     |
| Matched      | 167     | 167     |
| Unmatched    | 13      | 473     |
| Discarded    | 0       | 0       |

| Overall balance test (Hansen & Bowers, 2010) |            |       |         |
|----------------------------------------------|------------|-------|---------|
|                                              | Chi-square | df    | P value |
| Overall                                      | 7.968      | 9.000 | .537    |

| Relative multivariate imbalance L1 (Iacus, King, & Porro, 2010) |                 |                |
|-----------------------------------------------------------------|-----------------|----------------|
|                                                                 | Before matching | After matching |
| Multivariate imbalance measure L1                               | .988            | .988           |

| Summary of unbalanced covariates ( $ d  > .25$ )         |
|----------------------------------------------------------|
| No covariate exhibits a large imbalance ( $ d  > .25$ ). |

### RGraph

## Distribution of Propensity Scores

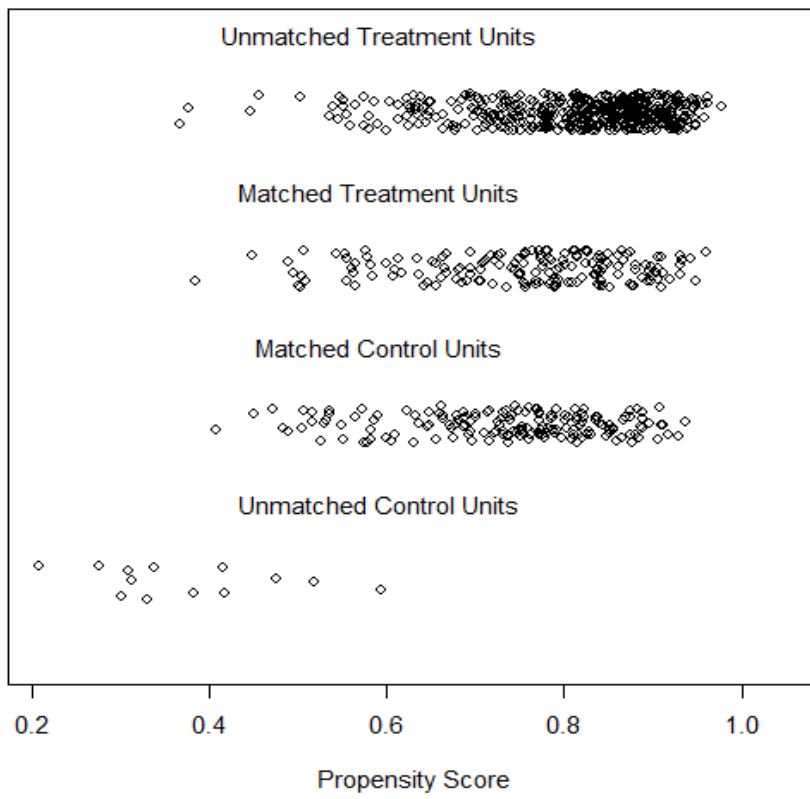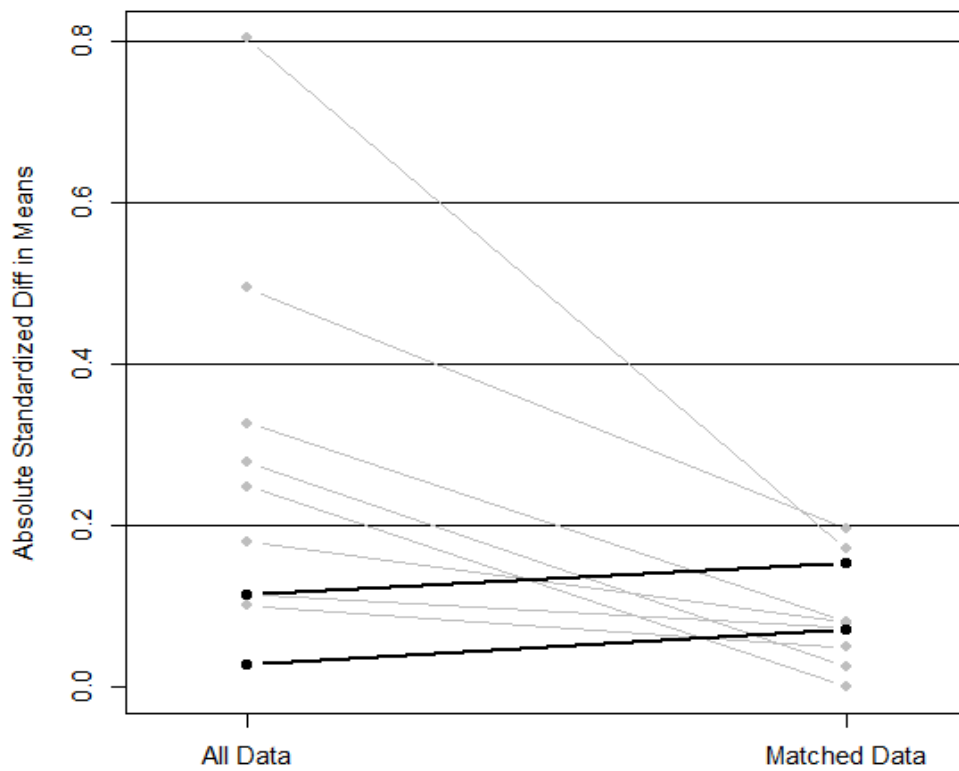

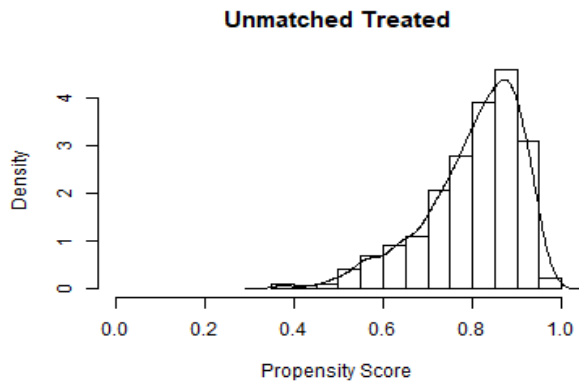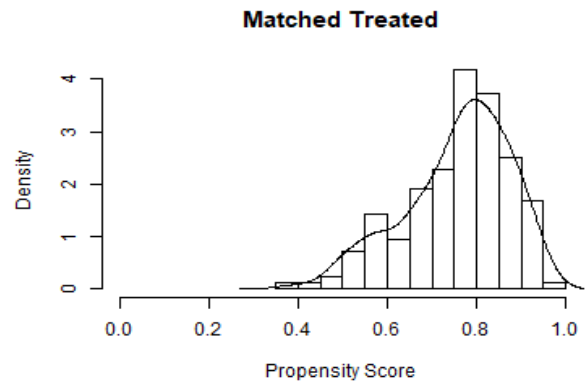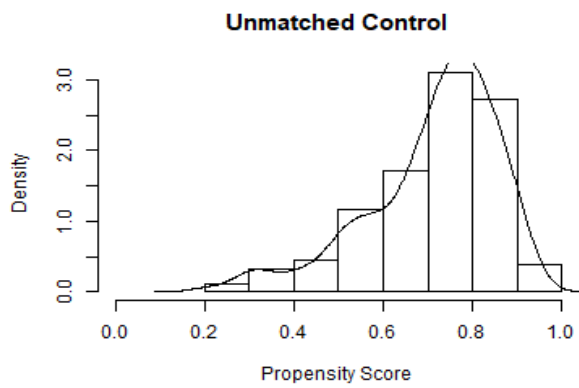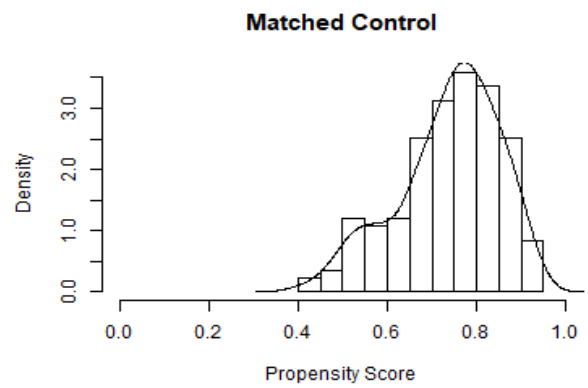

**Standardized differences before matching**

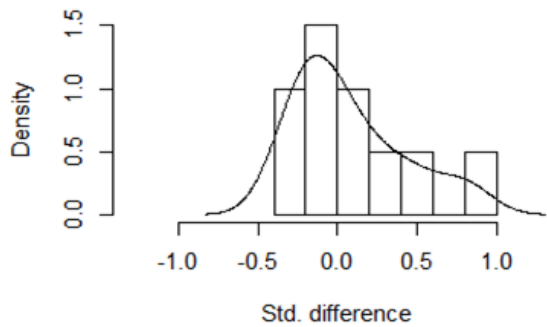

**Standardized differences after matching**

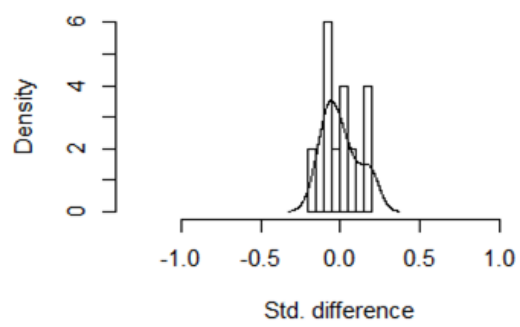

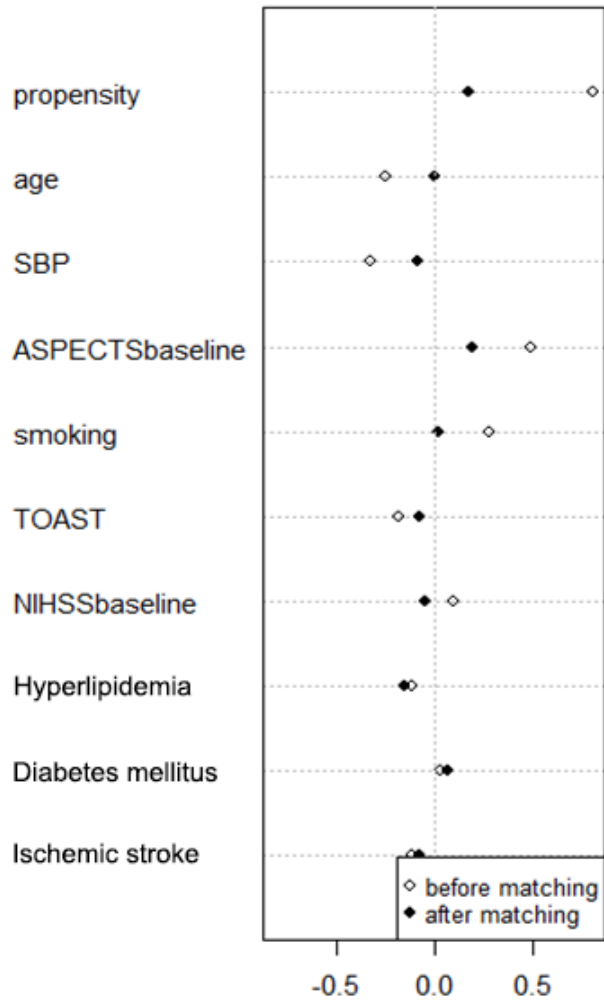

## **eMethods 2. Treatment method**

Endovascular recanalization procedures consisted of mechanical thrombectomy, thromboaspiration, balloon dilation, stenting, intra-arterial thrombolysis, or various combinations of these approaches. Re-occlusion often occurred after thrombectomy in atherosclerotic disease, therefore, rescue therapy including balloon dilation, stenting, intra-arterial thrombolysis, and glycoprotein IIb/IIIa inhibitor might be utilized to retrieve recanalization. After recanalization of the target artery, most of the patients were transferred to the neuro-intensive care unit for at least 24 hours with their systolic blood pressure maintained at 120-140 mmHg. Additionally, the patients who underwent extracranial or intracranial stent implantation were prescribed antithrombotic medication to prevent acute stent thrombosis. For the patients without prior intravenous alteplase, loading doses of clopidogrel (300 mg) and aspirin (300 mg) were given, or a low dose of glycoprotein IIb/IIIa inhibitor was bolus-injected intra-arterially and maintained for at least 24 hours, while for those with prior intravenous alteplase, clopidogrel (75 mg) and aspirin (100 mg) were given after 24h of alteplase administration, then all the patients were given clopidogrel (75 mg/d) and aspirin (100 mg/d) for 1-3 months.

### **eMethods 3. Definition of sICH and aICH**

Intracranial hemorrhage was classified as one of the following subtype: Hemorrhagic infarction1 (HI1): scattered small petechiae, no mass effect; HI2: confluent petechiae, no mass effect; Parenchymal hematoma1 (PH1): hematoma within infarct tissue and occupied less than 30% of the infarct volume, no substantive mass effect; Parenchymal hematoma2 (PH2): hematoma occupied 30% or more of the infarct volume, with obvious mass effect; Remote parenchymal hematoma (rPH): parenchymal hematoma remote from the infarct tissue; Intraventricular hemorrhage (IVH); Subarachnoid hemorrhage (SAH); Subdural hemorrhage (SDH). sICH was diagnosed if the new observed intracranial hemorrhage was associated with any of the following conditions: 1) NIHSS score increased more than 4 points than that immediately before worsening; 2) NIHSS score increased more than 2 points in one category; 3) Deterioration led to intubation, hemicraniectomy, external ventricular drain placement or any other major interventions. Additionally, the symptom deteriorations could not be explained by causes other than the observed intracranial hemorrhage. Asymptomatic intracranial hemorrhage (aICH) was diagnosed if the new observed intracranial hemorrhage was not accompanied by any of the above conditions. For hemorrhage classified as PH2, even if the neurological function deteriorations could be attributed to infarction per se, the hemorrhage should be classified as sICH. However, for hemorrhage classified as HI1, HI2, PH1, rPH, IVH, SAH or SDH, if the neurological function deteriorations could be attributed to infarction per se, the hemorrhage should be classified as asymptomatic.



**eTable 1. Ordinal regression model of primary outcome based on PSM dataset including the propensity score as a covariate**

|                 |                                 | Estimate       | Std. Error | Wald   | df   | Sig.   | 95% Confidence Interval |             |
|-----------------|---------------------------------|----------------|------------|--------|------|--------|-------------------------|-------------|
|                 |                                 |                |            |        |      |        | Lower Bound             | Upper Bound |
| Threshold       | [mRS 90 d = 0]                  | -9.286         | 2.959      | 9.846  | 1    | .002   | -15.086                 | -3.486      |
|                 | [mRS 90 d = 1]                  | -7.967         | 2.945      | 7.320  | 1    | .007   | -13.739                 | -2.196      |
|                 | [mRS 90 d = 2]                  | -7.551         | 2.941      | 6.592  | 1    | .010   | -13.316                 | -1.787      |
|                 | [mRS 90 d = 3]                  | -7.303         | 2.939      | 6.175  | 1    | .013   | -13.064                 | -1.543      |
|                 | [mRS 90 d = 4]                  | -6.616         | 2.934      | 5.086  | 1    | .024   | -12.366                 | -.866       |
|                 | [mRS 90 d = 5]                  | -5.766         | 2.928      | 3.878  | 1    | .049   | -11.505                 | -.027       |
| Location        | age                             | .004           | .012       | .101   | 1    | .751   | -.020                   | .027        |
|                 | pc-ASPECTS baseline             | -.315          | .112       | 7.894  | 1    | .005   | -.534                   | -.095       |
|                 | NIHSS baseline                  | .096           | .013       | 51.933 | 1    | .000   | .070                    | .123        |
|                 | Onset to imaging diagnosis time | .000           | .000       | 1.215  | 1    | .270   | -.001                   | .000        |
|                 | Propensity score                | -2.423         | 1.669      | 2.109  | 1    | .146   | -5.695                  | .848        |
|                 | Onset to outcome measurement    | -.047          | .028       | 2.861  | 1    | .091   | -.101                   | .007        |
|                 | [group=0]                       | 1.086          | .242       | 20.161 | 1    | .000   | .612                    | 1.561       |
|                 | [group=1]                       | 0 <sup>a</sup> |            |        | 0    |        |                         |             |
|                 | [diabetes mellitus=0]           | .042           | .279       | .022   | 1    | .881   | -.505                   | .589        |
|                 | [diabetes mellitus=1]           | 0 <sup>a</sup> |            |        | 0    |        |                         |             |
|                 | [Ischemic stroke=0]             | -.354          | .290       | 1.487  | 1    | .223   | -.922                   | .215        |
|                 | [Ischemic stroke=1]             | 0 <sup>a</sup> |            |        | 0    |        |                         |             |
|                 | [sex=0]                         | -.427          | .265       | 2.582  | 1    | .108   | -.947                   | .094        |
|                 | [sex=1]                         | 0 <sup>a</sup> |            |        | 0    |        |                         |             |
|                 | [IV Thrombolysis=0]             | .574           | .293       | 3.835  | 1    | .050   | -.001                   | 1.149       |
|                 | [IV Thrombolysis=1]             | 0 <sup>a</sup> |            |        | 0    |        |                         |             |
|                 | [BA Distal=1]                   | -.514          | .418       | 1.507  | 1    | .220   | -1.334                  | .306        |
|                 | [BA Middle=2]                   | .277           | .378       | .536   | 1    | .464   | -.464                   | 1.018       |
| [BA Proximal=3] | .007                            | .529           | .000       | 1      | .989 | -1.029 | 1.044                   |             |

|                                                                                               |           | Estimate       | Std. Error | Wald | df | Sig. | 95% Confidence Interval |             |
|-----------------------------------------------------------------------------------------------|-----------|----------------|------------|------|----|------|-------------------------|-------------|
|                                                                                               |           |                |            |      |    |      | Lower Bound             | Upper Bound |
|                                                                                               | [VA-V4=4] | 0 <sup>a</sup> |            |      | 0  |      |                         |             |
| <p>Link function: Logit.</p> <p>a. This parameter is set to zero because it is redundant.</p> |           |                |            |      |    |      |                         |             |

**eTable 2. Multivariate regression models of outcomes based on the full dataset including the propensity score as a covariate**

|                                              | Effect variable | Adjusted Value <sup>1</sup><br>(95% CI) | P value | Adjusted Value <sup>2</sup><br>(95% CI) | P value |
|----------------------------------------------|-----------------|-----------------------------------------|---------|-----------------------------------------|---------|
| <b>Primary efficacy outcome</b>              |                 |                                         |         |                                         |         |
| mRS at 90 days                               | cOR             | 2.91(1.96 to 4.34)                      | < 0.001 | 2.98(2.01 to 4.42)                      | < 0.001 |
| <b>Secondary efficacy outcomes</b>           |                 |                                         |         |                                         |         |
| mRS 0~3 at 90 days                           | OR              | 4.21(2.25 to 7.90)                      | < 0.001 | 4.70(2.53 to 8.75)                      | < 0.001 |
| mRS 0~2 at 90 days                           | OR              | 4.70(2.32 to 9.52)                      | < 0.001 | 4.90(2.43 to 9.87)                      | < 0.001 |
| mRS 0~1 at 90 days                           | OR              | 4.57(2.17 to 9.61)                      | < 0.001 | 4.54(2.16 to 9.56)                      | < 0.001 |
| NIHSS score change from baseline at 24 hours | Beta            | -2.62(-4.19 to -1.04)                   | 0.001   | -2.57(-4.13 to -1.01)                   | 0.001   |
| NIHSS score change from baseline at 5~7 days | Beta            | -5.39(-7.38 to -3.40)                   | < 0.001 | -5.37(-7.35 to -3.40)                   | < 0.001 |
| <b>Safety outcomes</b>                       |                 |                                         |         |                                         |         |
| Mortality at 90 days                         | OR              | 2.81(1.86 to 4.24)                      | < 0.001 | 2.93(1.95 to 4.40)                      | < 0.001 |

Adjusted estimates of effect were calculated using multiple ordinal and binary logistic regression and linear regression taking the following variables into account: age, baseline NIHSS, baseline pc-ASPECTS, onset to imaging diagnosis time, sex, diabetes mellitus, ischemic stroke, IVT, location of occlusion, and propensity score.

1 Model 1: Propensity score was included in model as a continuous variable.

2. Model 2: Propensity score was divided into 4 categories according interquartile and included in model as a categorical variable.

Abbreviations: CI = confidence interval; cOR = common odds ratio; mRS = modified Rankin Scale score; NIHSS= National Institutes of Health Stroke Scale; OR = odds ratio.

**eTable 3. Data elements in the BASILAR cohort study**

| Category                   | Example variable                                                                                                                                                                                                                                                                                                                                                                                                               |
|----------------------------|--------------------------------------------------------------------------------------------------------------------------------------------------------------------------------------------------------------------------------------------------------------------------------------------------------------------------------------------------------------------------------------------------------------------------------|
| Demographics               | Age and sex                                                                                                                                                                                                                                                                                                                                                                                                                    |
| Medical history            | Hypertension, hyperlipidemia, diabetes, atrial fibrillation, chronic heart failure, valvular heart disease, stroke, transient ischemic attack, intracerebral hemorrhage, chronic obstructive pulmonary disease, hyperhomocysteine, chronic renal failure and current smoker                                                                                                                                                    |
| Laboratory measures        | Blood cell counts, triglyceride, cholesterol, low density lipoprotein, high density lipoprotein, homocysteine, glucose, procalcitonin, HbA1C, prothrombin time, activated partial thromboplastin time, thrombin time, fibrinogen, D-dimer, international normalized ratio                                                                                                                                                      |
| Clinical characteristics   | Stroke severity at time of treatment, NIHSS score at admission, GCS score at admission, premorbid mRS score, systolic blood pressure at admission and presumed stroke etiology by TOAST type <sup>2</sup>                                                                                                                                                                                                                      |
| Imaging characteristics    | Preoperative pc-ASPECTS on non-contrast CT, occlusion sites and collateral state*                                                                                                                                                                                                                                                                                                                                              |
| Procedural characteristics | Intravenous thrombolytic therapy, anesthesia methods, process time (onset to door time, door to imaging time, door to needle time, door to puncture time, door to recanalization time, onset to imaging time, onset to puncture time, onset to recanalization, puncture to revascularization time), operation methods, passes of thrombectomy, thrombectomy device, intraoperative medication                                  |
| Outcome measures           | mRS score at 90 days, proportion of mRS score 0~3 vs. 4~6, proportion of mRS score 0~2 vs. 3~6, proportion of mRS score 0~1 vs. 2~6, post-procedure mTICI, vessel recanalization evaluated by CTA or MRA at 24 hours, NIHSS score at 24 hours and at 5-7days or discharge, GCS score at 24 hours and at 5-7days or discharge                                                                                                   |
| Safety aspects             | Death, symptomatic intracerebral hemorrhage, gastrointestinal hemorrhage, systemic complications (e.g., stroke-associated pneumonia, cerebral hernia, heart failure, respiratory failure, urinary infection, deep venous thrombosis), procedure- and device-related complications (e.g., arterial perforation, arterial dissection, embolization to previously uninvolved arteries, device failure, access-site complications) |

Abbreviations: BAO= basilar artery occlusion; NIHSS<sup>3</sup>= National Institute Health Stroke Scale; GCS= Glasgow Coma Scale; pc-ASPECTS<sup>4</sup>=posterior circulation-Alberta Stroke Program Early Computed Tomography Score; mRS<sup>5</sup>= Modified Rankin Scale; CTA= computed tomography angiography; MRA= magnetic resonance angiography; mTICI<sup>6</sup>=modified thrombolysis in cerebral infarction; Symptomatic intracerebral hemorrhage was assessed according to the Heidelberg Bleeding Classification<sup>7</sup>. \* Collateral flow grading was estimated through the American Society of Interventional and Therapeutic Neuroradiology/Society of Interventional Radiology (ASITN/SIR)<sup>8</sup>system, Basilar Artery on Computed Tomography Angiography (BATMAN) score<sup>9</sup>, the Posterior Circulation Collateral score (PC-CS)<sup>10</sup>.

**eTable 4. Participating centers and eligible patients**

| Participating centers                                                               | N=829    |
|-------------------------------------------------------------------------------------|----------|
| Nanyang Central Hospital                                                            | 71(8.6%) |
| The First Affiliated Hospital of Jilin University                                   | 57(6.9%) |
| Linyi People's Hospital                                                             | 45(5.4%) |
| Affiliated Hangzhou First People's Hospital, Zhejiang University School of Medicine | 39(4.7%) |
| Zhangzhou Affiliated Hospital of Fujian Medical University                          | 39(4.7%) |
| The 900 <sup>th</sup> Hospital of The People's Liberation Army                      | 38(4.6%) |
| The 924 <sup>th</sup> Hospital of The People's Liberation Army                      | 35(4.2%) |
| Changsha Central Hospital                                                           | 31(3.7%) |
| Zhongshan People's Hospital                                                         | 30(3.6%) |
| The 904 <sup>th</sup> Hospital of The People's Liberation Army (Wuxi City)          | 28(3.4%) |
| Northern Theater General Hospital of The People's Liberation Army                   | 25(3.0%) |
| The 909 <sup>th</sup> Hospital of The People's Liberation Army                      | 25(3.0%) |
| Wuhan No. 1 Hospital                                                                | 24(2.9%) |
| Xinqiao Hospital and the Second Affiliated Hospital, Army Medical University        | 21(2.5%) |
| The First People's Hospital of Yangzhou, Yangzhou University                        | 19(2.3%) |
| The First People's Hospital of Chenzhou                                             | 18(2.2%) |
| Ganzhou People's Hospital                                                           | 17(2.1%) |
| Zhuzhou Central Hospital                                                            | 17(2.1%) |
| Yijishan Hospital of Wannan Medical College                                         | 16(1.9%) |
| Chinese Medical Hospital of Maoming                                                 | 15(1.8%) |
| Yunfu People's Hospital                                                             | 15(1.8%) |
| The First Affiliated Hospital of Henan Science and Technology University            | 14(1.7%) |
| Hubei Zhongshan Hospital                                                            | 14(1.7%) |
| Jilin Central Hospital                                                              | 13(1.6%) |
| Yuhuangding Hospital, Qingdao University                                            | 13(1.6%) |
| Changle People's Hospital                                                           | 12(1.4%) |
| Affiliated Hospital of Guangdong Medical University                                 | 12(1.4%) |
| Xiangyang Central Hospital, Hubei Arts and Science University                       | 12(1.4%) |
| Chinese Medical Hospital of Zhongshan                                               | 12(1.4%) |
| Lu'an Affiliated Hospital of Anhui Medical University                               | 11(1.3%) |
| Hubei Province People's Hospital                                                    | 10(1.2%) |
| The 902 <sup>th</sup> Hospital of The People's Liberation Army                      | 10(1.2%) |
| The First Affiliated Hospital of Shandong First Medical University                  | 9(1.1%)  |
| Sichuan Provincial People's Hospital                                                | 9(1.1%)  |
| Xuzhou Central Hospital                                                             | 8(1.0%)  |
| Taihe Affiliated Hospital of Hubei Medical University                               | 6(0.7%)  |
| Baise People's Hospital                                                             | 5(0.6%)  |
| The Affiliated Huaian No.1 People's Hospital of Nanjing Medical University          | 5(0.6%)  |
| The Third Hospital of Shandong Province                                             | 5(0.6%)  |
| The Chinese Armed Police Force Guangdong Armed Police Corps Hospital                | 5(0.6%)  |
| The Third People's Hospital of Zigong                                               | 5(0.6%)  |

| <b>Participating centers</b>                                       | <b>N=829</b> |
|--------------------------------------------------------------------|--------------|
| The Third Affiliated Hospital of Guangzhou Medical University      | 4(0.5%)      |
| Hubei Wuchang Hospital                                             | 3(0.4%)      |
| The First People's Hospital of Xiangyang, Hubei Medical University | 3(0.4%)      |
| Affiliated Hospital of North Sichuan Medical College               | 2(0.2%)      |
| Guiping People's Hospital                                          | 1(0.1%)      |
| The 476 <sup>th</sup> Hospital of The People's Liberation Army     | 1(0.1%)      |

**eFigure 1. Consort flow diagram of the BASILAR study**

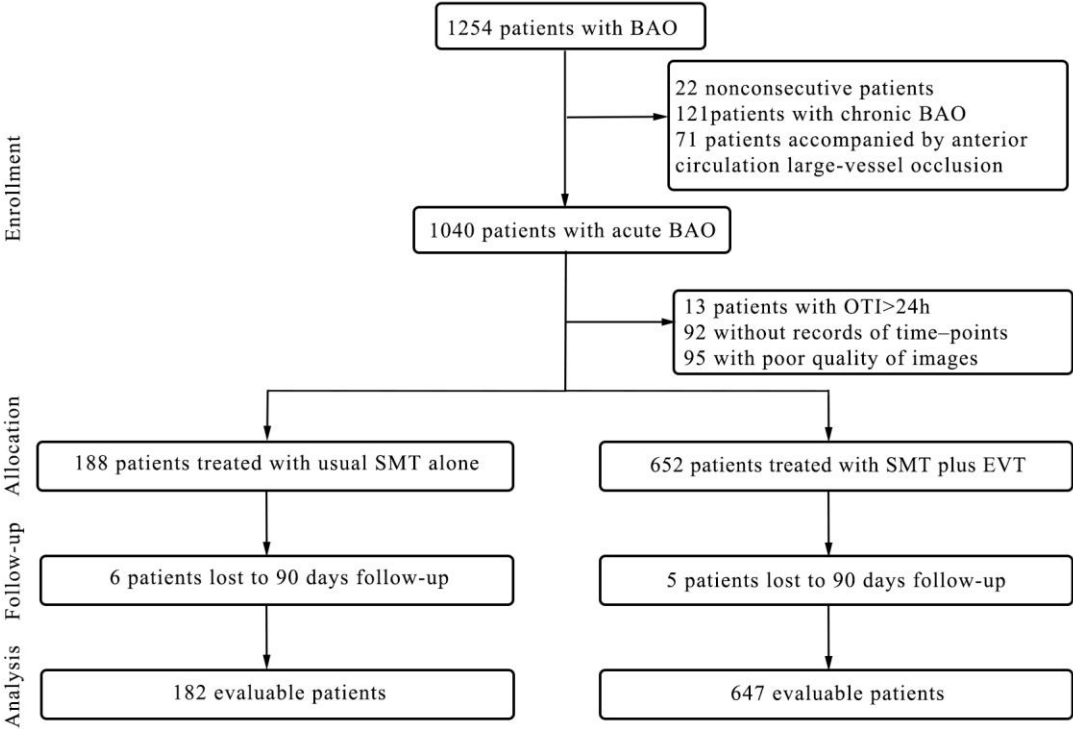

Abbreviations: BAO = basilar artery occlusion; EVT = endovascular treatment; OTI = onset to imaging diagnosis time; SMT = standard medical treatment

**eFigure 2. Distribution of the BASILAR study centers on the map of China**

The BASILAR is a nationwide prospective registry which compromised 47 comprehensive stroke centers across 15 provinces in China. These provinces account for 65.91% of the country’s population and cover an area of 27.75% of China. Therefore, the patients recruited in this study are good representative.

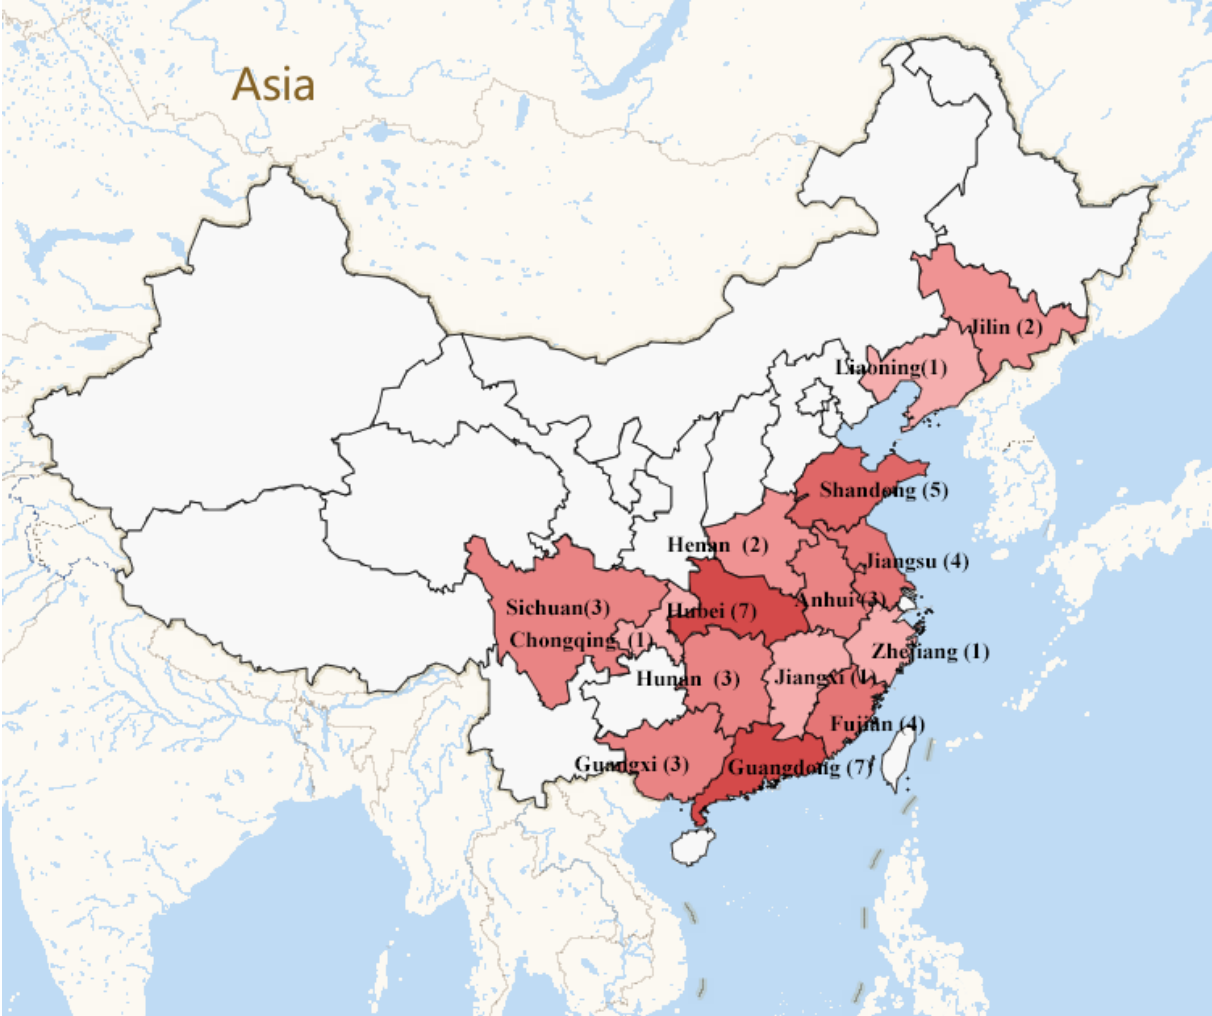



**eFigure 3. Horizontal stacked bar graphs of mRS outcome by key co-variables in all subjects. Distribution of modified Rankin Scale score at 90 days of all subjects with age >= 65 years vs. < 65 years. Threshold for age was chosen at the median. EVT denotes endovascular treatment.**

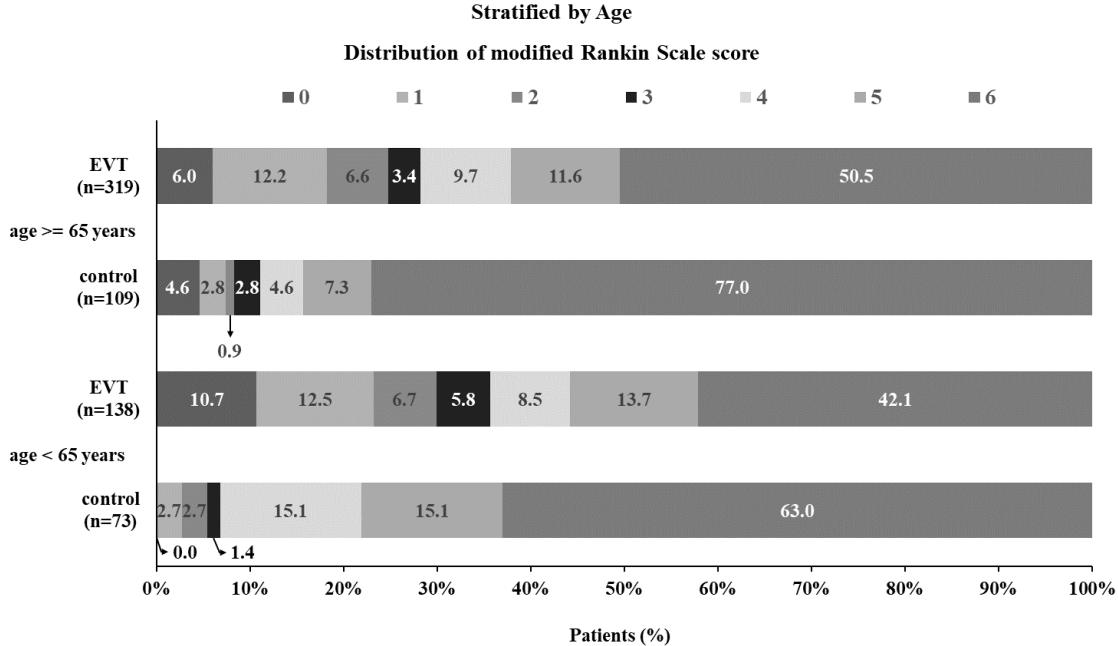

**eFigure 4.** Distribution of modified Rankin Scale score at 90 days of all subjects stratified by sex.

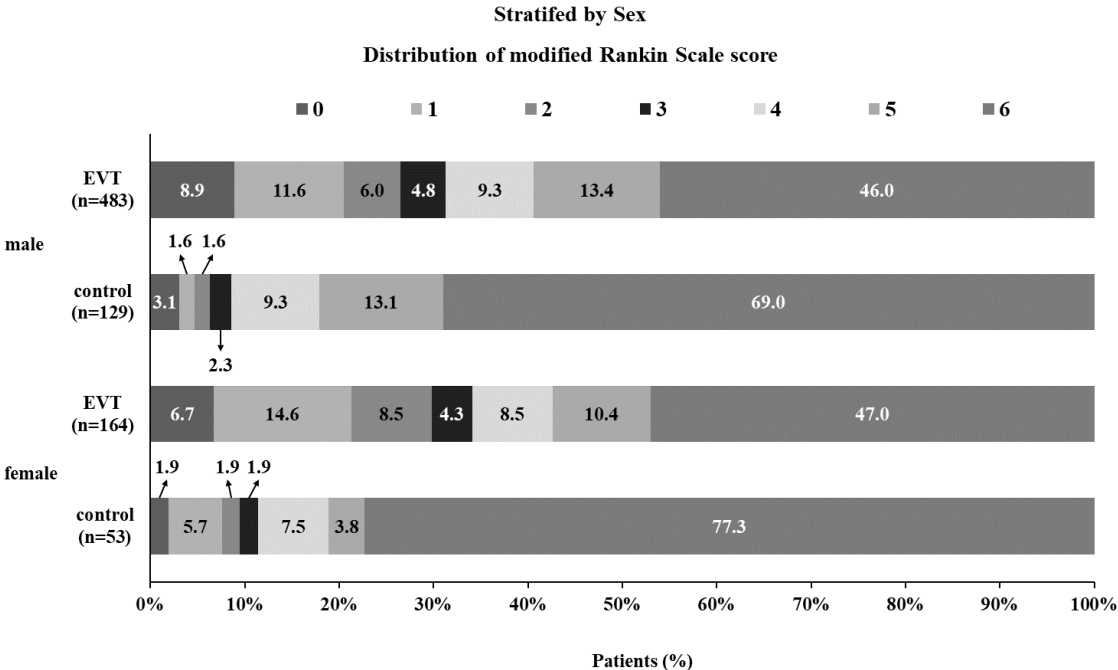

**eFigure 5.** Distribution of modified Rankin Scale score at 90 days of all subjects with stratified by baseline NIHSS ( $\geq 27$  or  $< 27$ ). Threshold for NIHSS was chosen at the median. NIHSS denotes National Institutes of Health Stroke Scale.

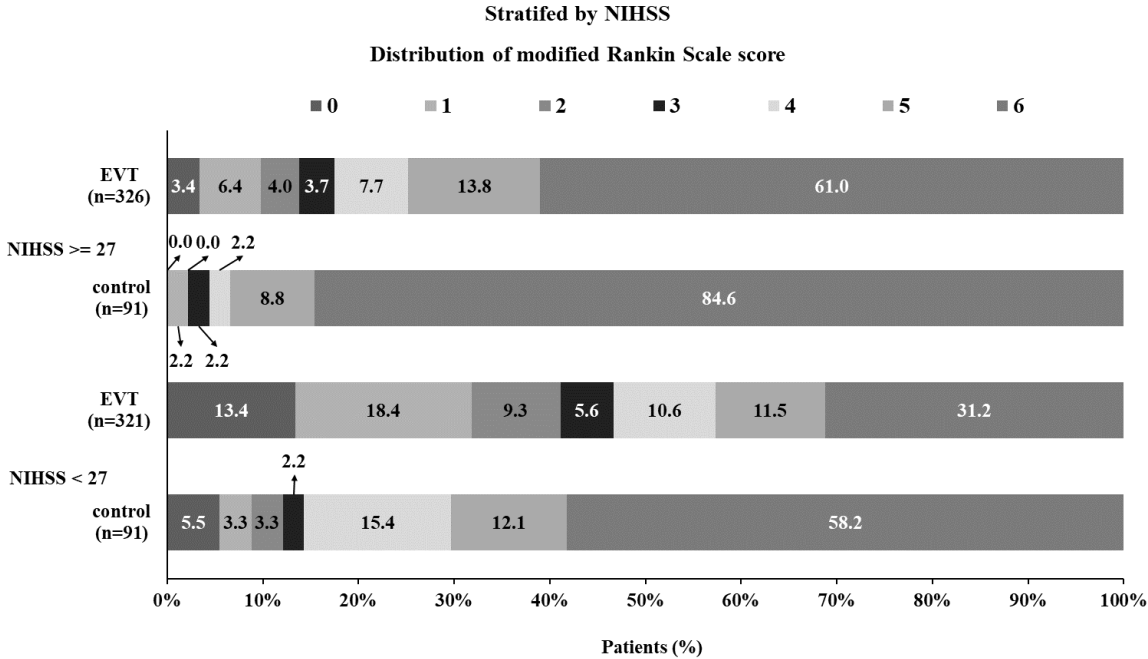

**eFigure 6.** Distribution of modified Rankin Scale score at 90 days of all subjects with baseline pc-ASPECTS < 8 vs. ≥ 8. Six subjects missing information about the pc-ASPECTS score. Threshold for pc-ASPECTS was chosen at median. pc-ASPECTS denotes posterior circulation-Alberta Stroke Program Early Computed Tomography Score.

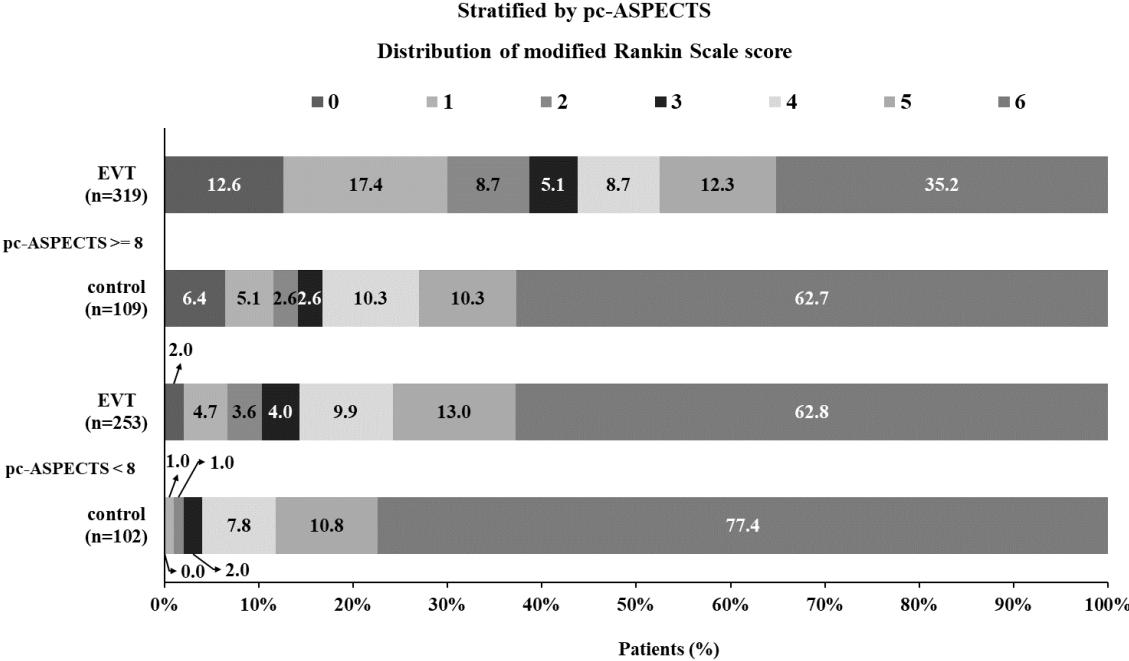

**eFigure 7.** Distribution of modified Rankin Scale score at 90 days of all subjects stratified by TOAST subtype (large artery atherosclerosis (LAA) or cardiac embolism (CE) or other).

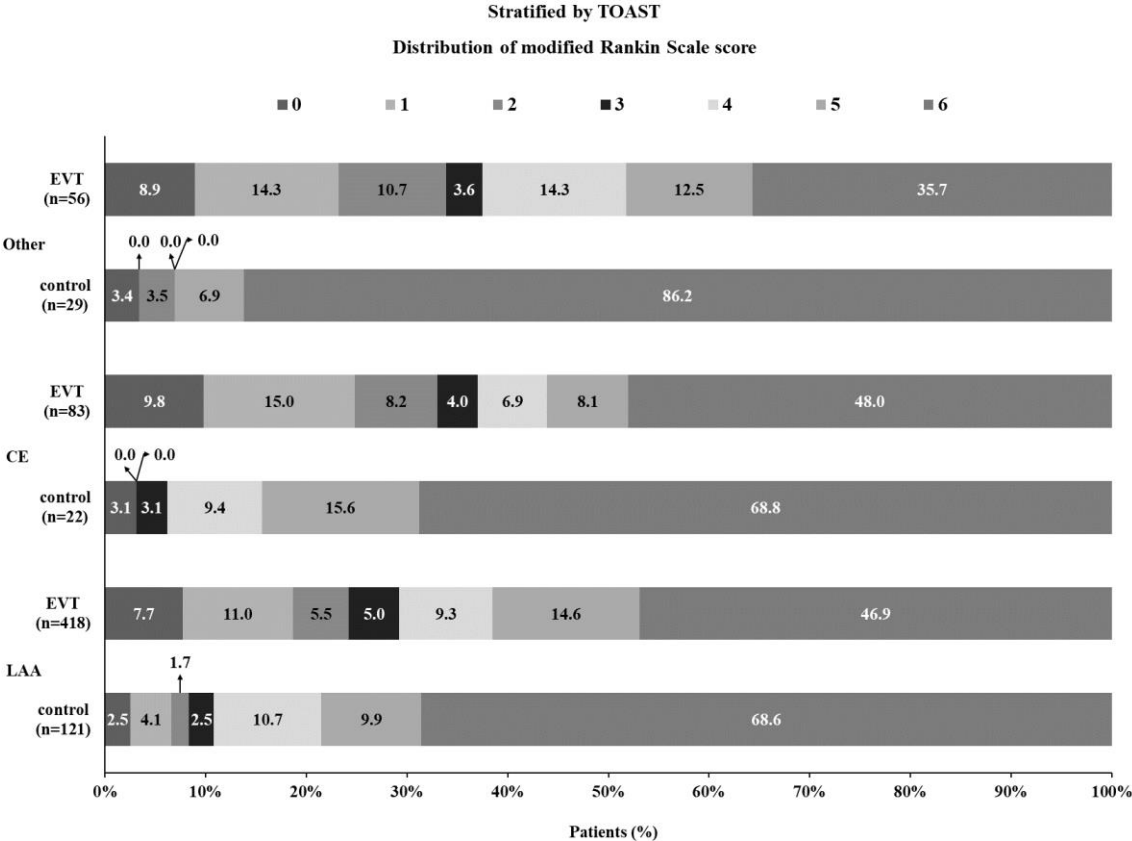

**eFigure 8.** Distribution of modified Rankin Scale score at 90 days of all subjects stratified by occlusion site (BA distal or BA middle or BA proximal or VA-V4). BA denotes basilar artery, VA-V4 the 4th segment of vertebral artery.

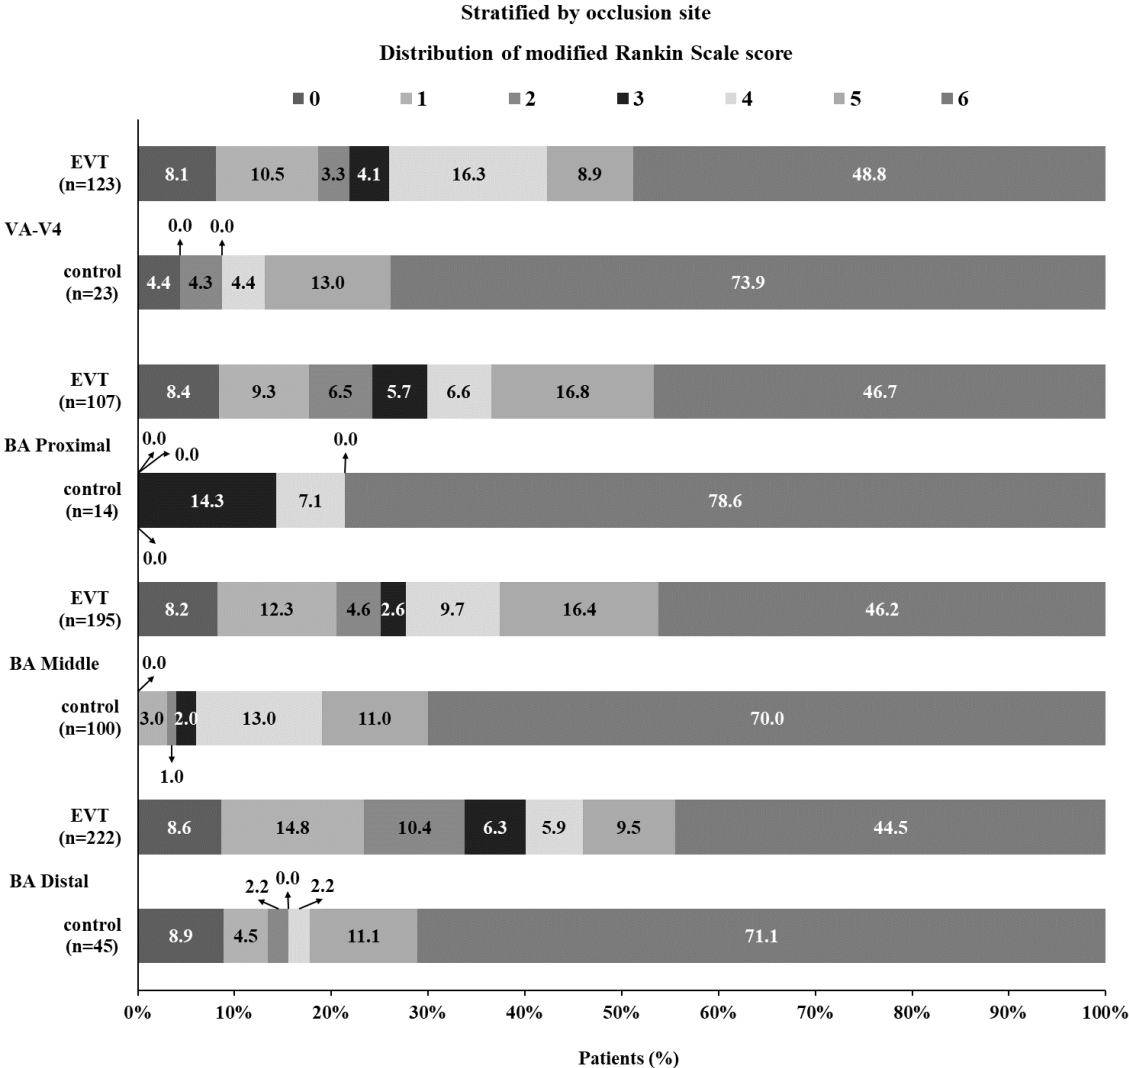

**eFigure 9.** Distribution of modified Rankin Scale score at 90 days of all subjects stratified by occlusion site (BA middle or non BA middle). BA denotes basilar artery.

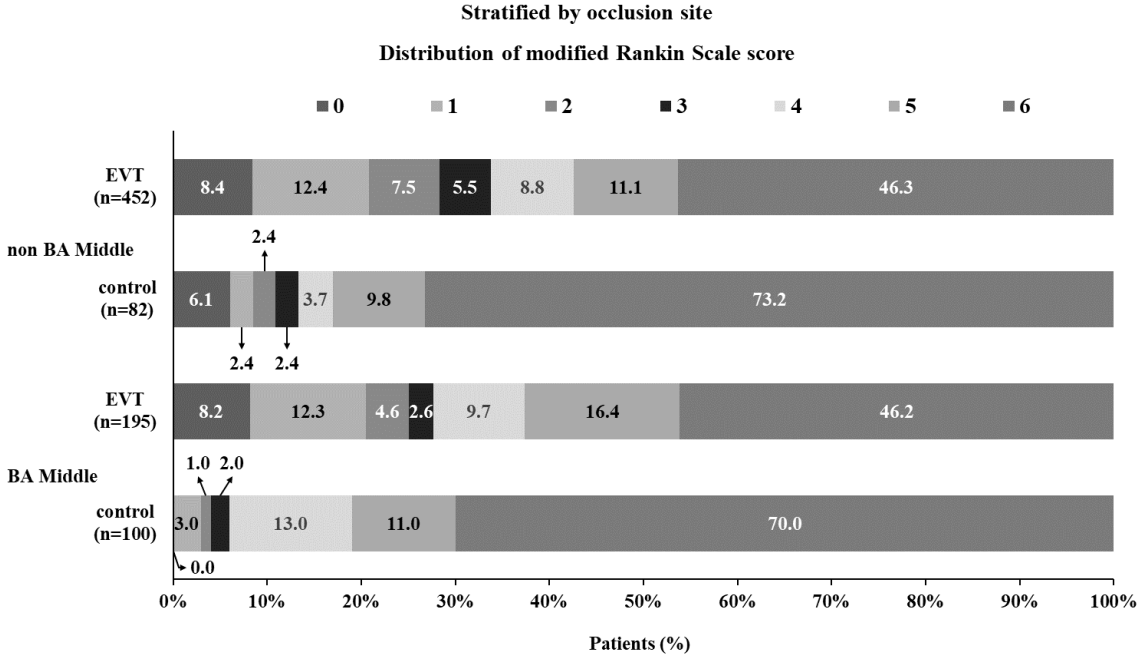

**eFigure 10.** Distribution of modified Rankin Scale score at 90 days of all subjects with time from stroke onset to imaging diagnosis (OTI)  $\leq$  360 min vs.  $>$  360 min. Threshold for time was chosen at the 75th percentile.

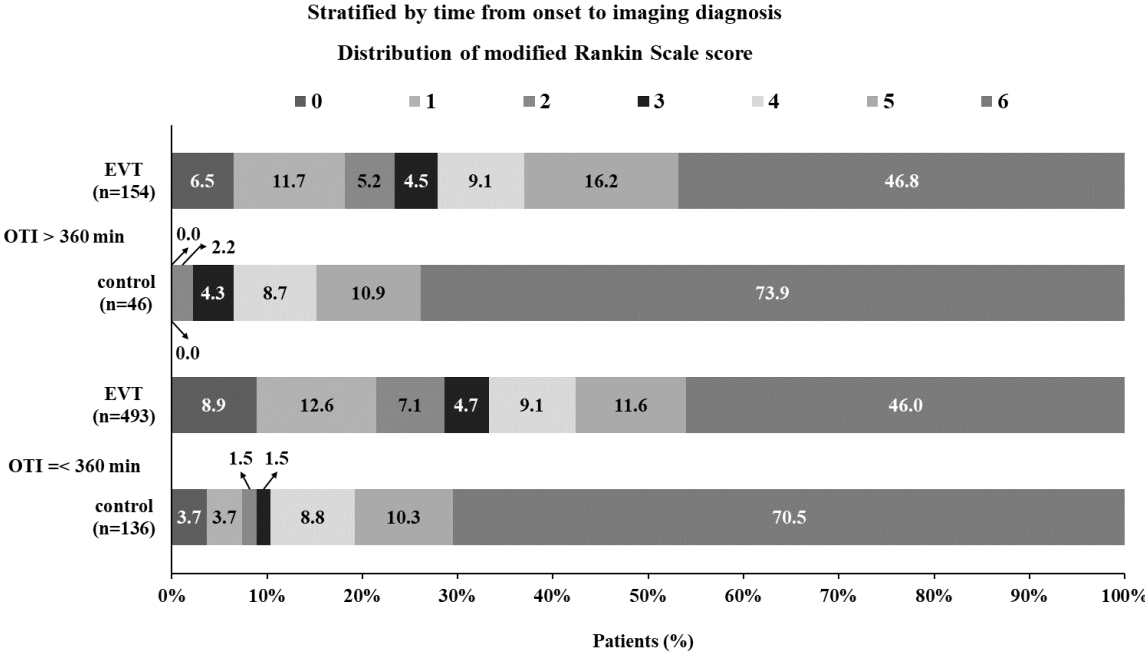



**eFigure 11.** Distribution of modified Rankin Scale score at 90 days of all subjects stratified by intravenous thrombolysis (IVT).

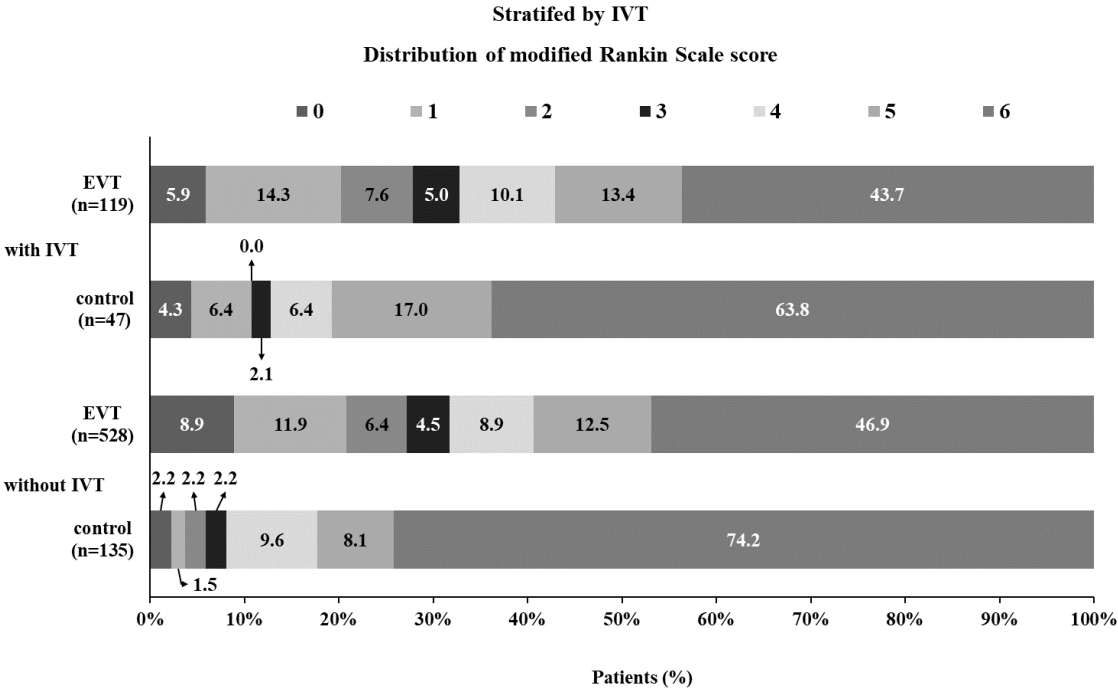

**eFigure 12. Horizontal stacked bar graphs of mRS outcome by key co-variables in the propensity score matching (PSM) dataset** Distribution of modified Rankin Scale score at 90 days of the patients in the PSM dataset with age  $\geq$  65 years vs.  $<$  65 years. Threshold for age was chosen at the median. EVT denotes endovascular treatment.

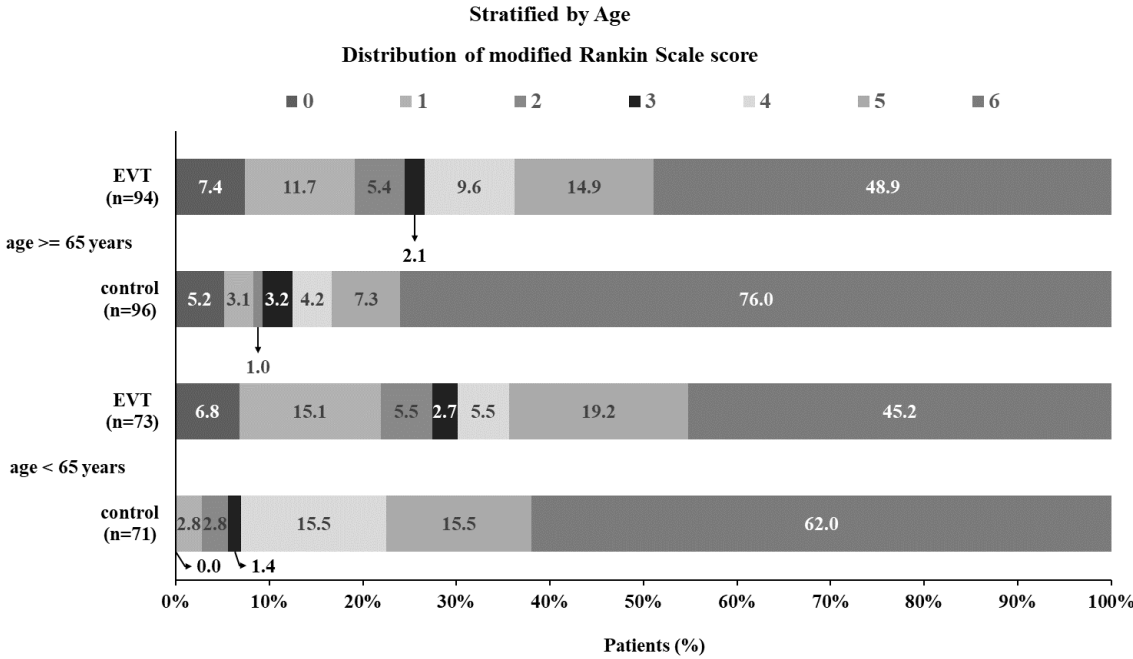

**eFigure 13.** Distribution of modified Rankin Scale score at 90 days of the patients in the PSM dataset stratified by sex.

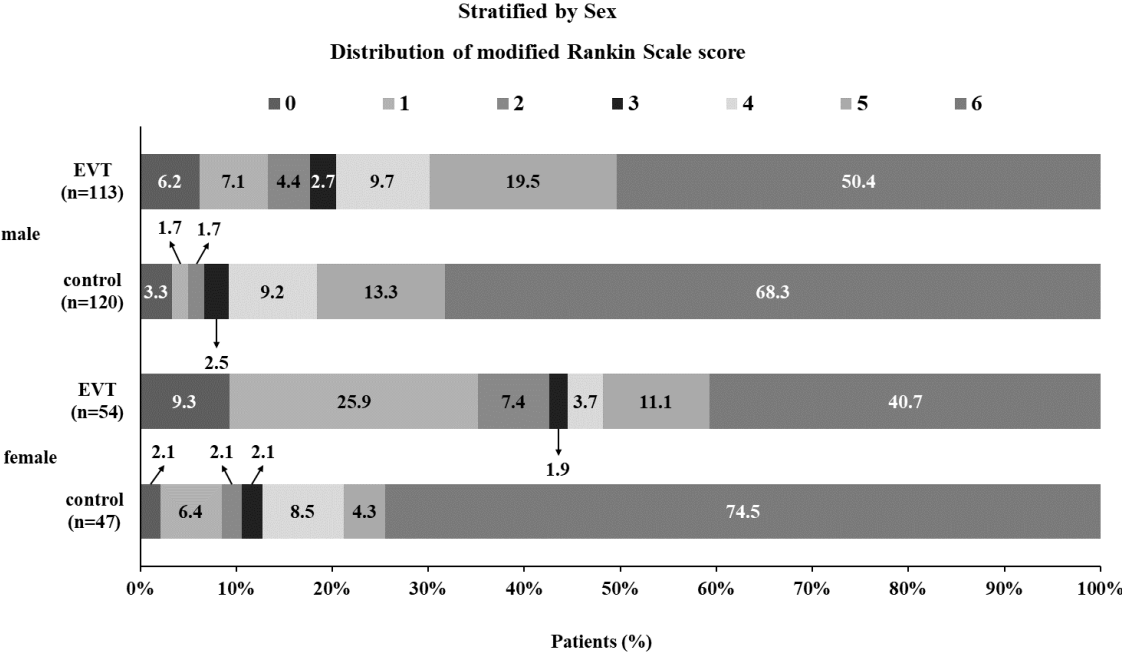

**eFigure 14.** Distribution of modified Rankin Scale score at 90 days of the patients in the PSM dataset with stratified by baseline NIHSS ( $\geq 26$  or  $< 26$ ). Threshold for NIHSS was chosen at the median. NIHSS denotes National Institutes of Health Stroke Scale.

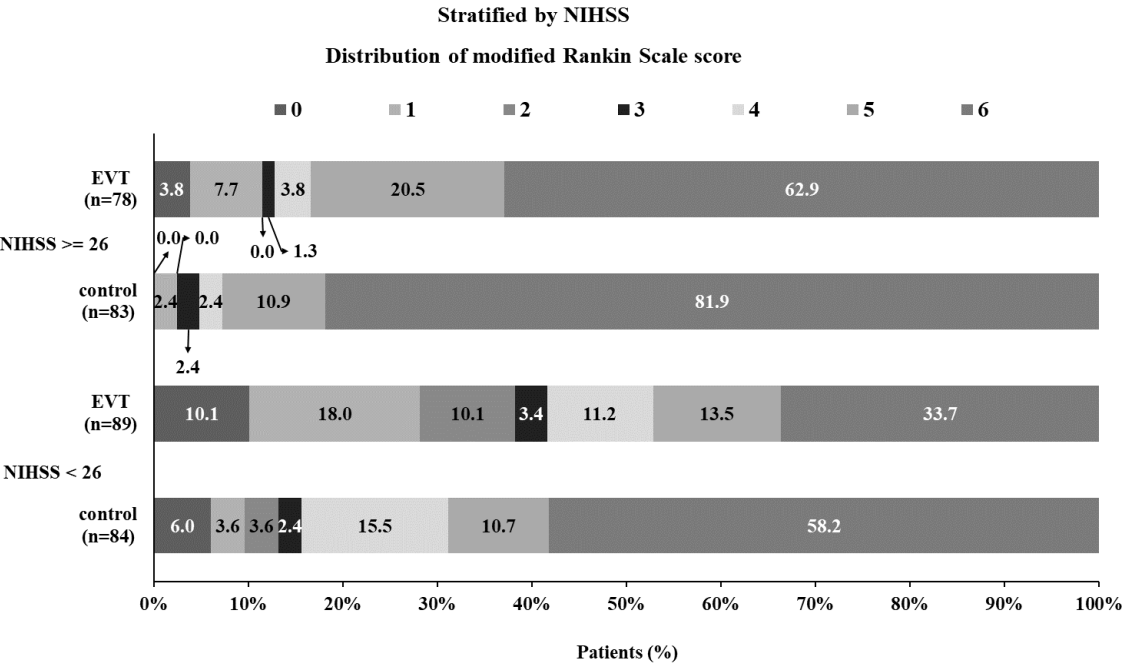

**eFigure 15.** Distribution of modified Rankin Scale score at 90 days of the patients in the PSM dataset with baseline pc-ASPECTS < 8 vs. >= 8. Threshold for ASPECTS was chosen at median. pc-ASPECTS denotes posterior circulation-Alberta Stroke Program Early Computed Tomography Score.

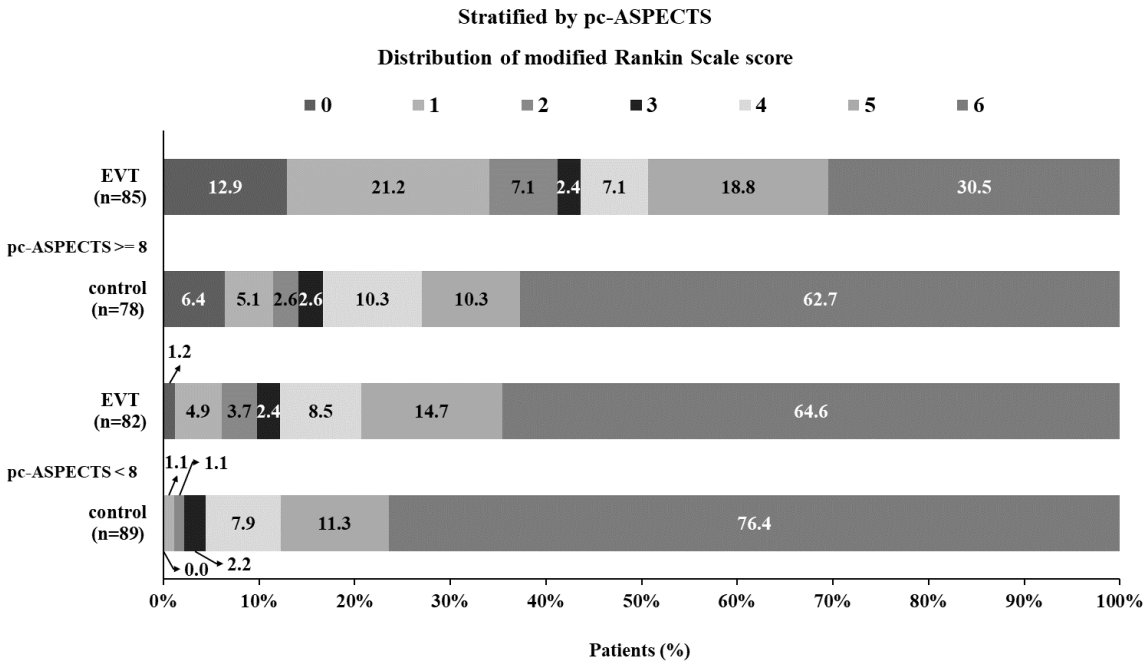

**eFigure 16.** Distribution of modified Rankin Scale score at 90 days of the patients in the PSM dataset stratified by TOAST subtype (large artery atherosclerosis (LAA) or cardiac embolism (CE) or other).

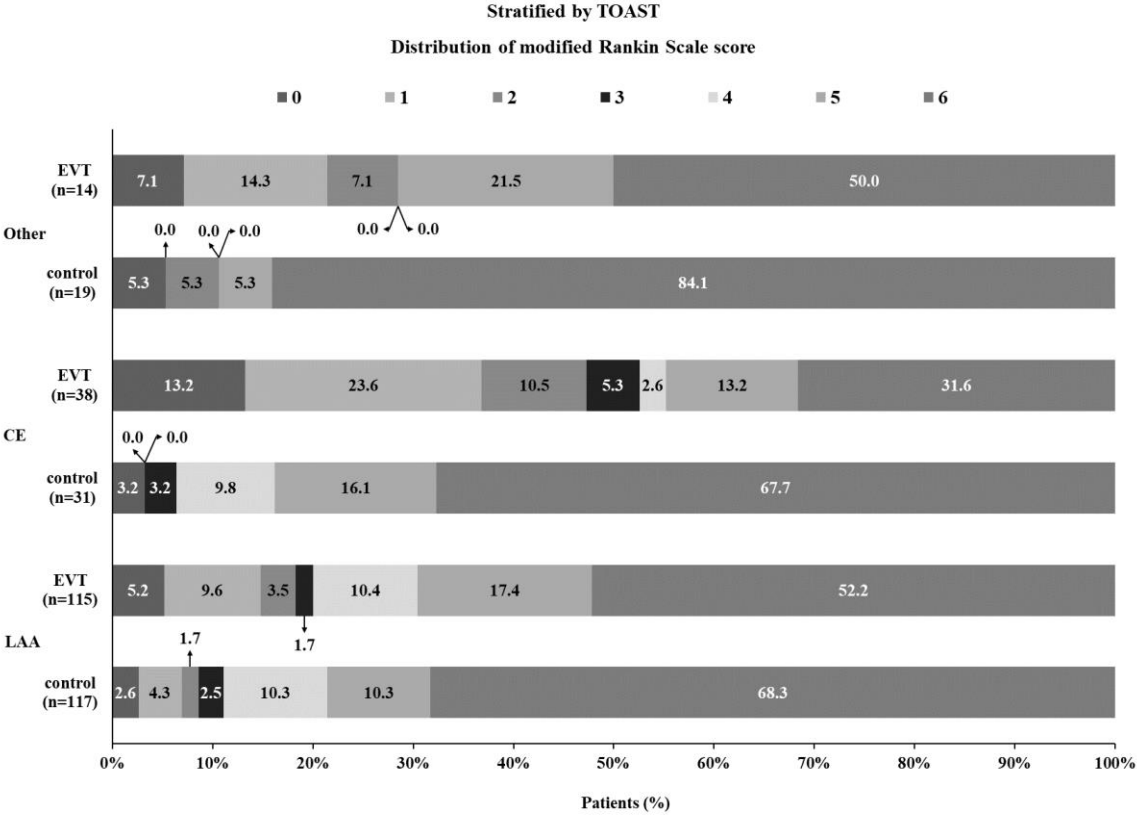

**eFigure 17.** Distribution of modified Rankin Scale score at 90 days of the patients in the PSM dataset stratified by occlusion site (BA distal or BA middle or BA proximal or VA-V4). BA denotes basilar artery, VA-V4 the 4th segment of vertebral artery.

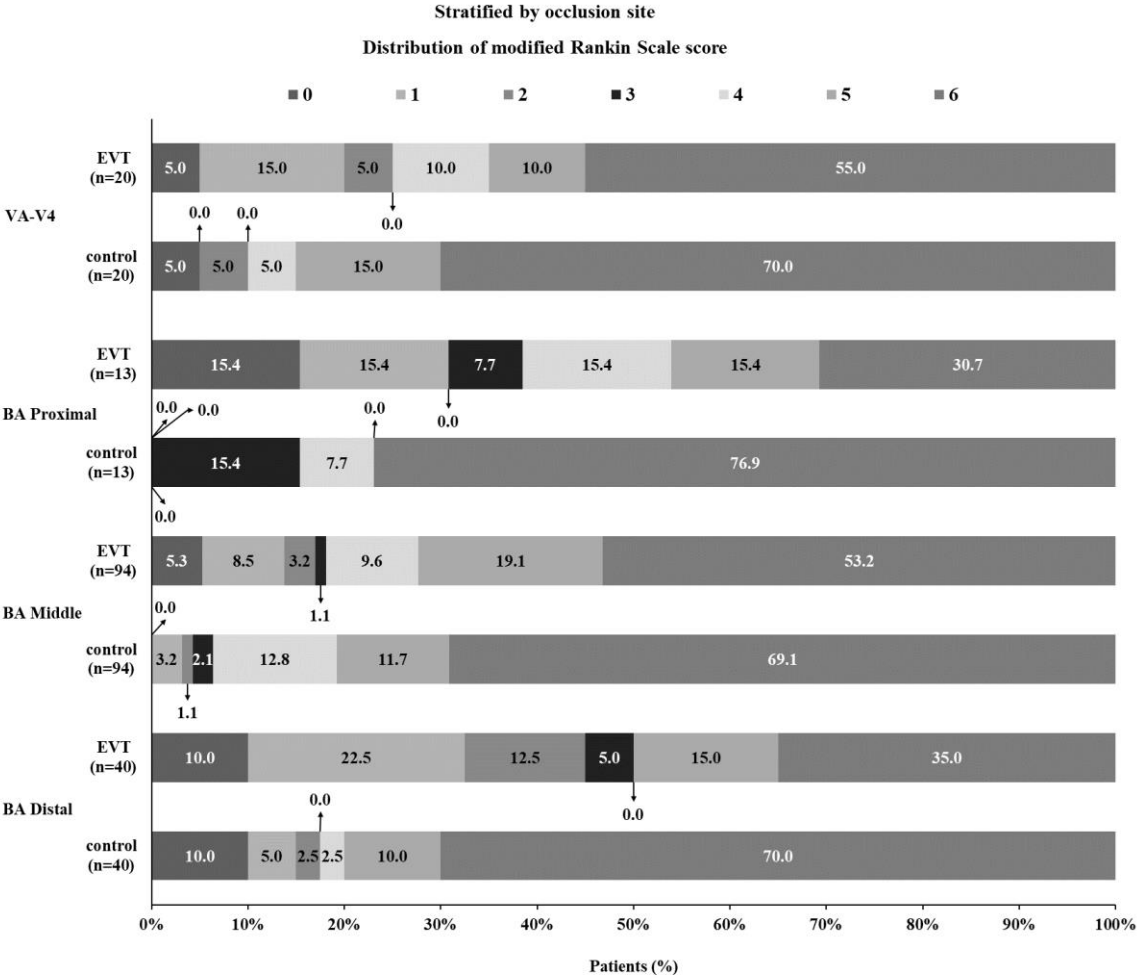

**eFigure 18.** Distribution of modified Rankin Scale score at 90 days of the patients in the PSM dataset stratified by occlusion site (BA middle or non BA middle). BA denotes basilar artery.

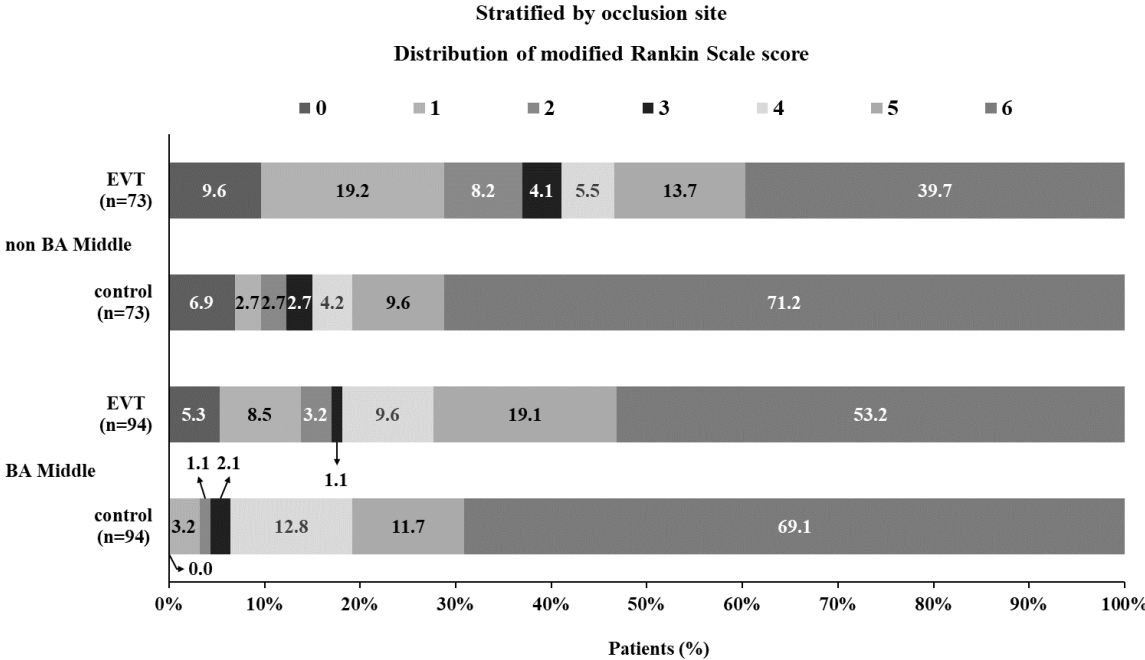



**eFigure 19.** Distribution of modified Rankin Scale score at 90 days of the patients in the PSM dataset with time from stroke onset to imaging diagnosis (OTI)  $\leq$  360 min vs.  $>$  360 min. Threshold for time was chosen at the 75th percentile.

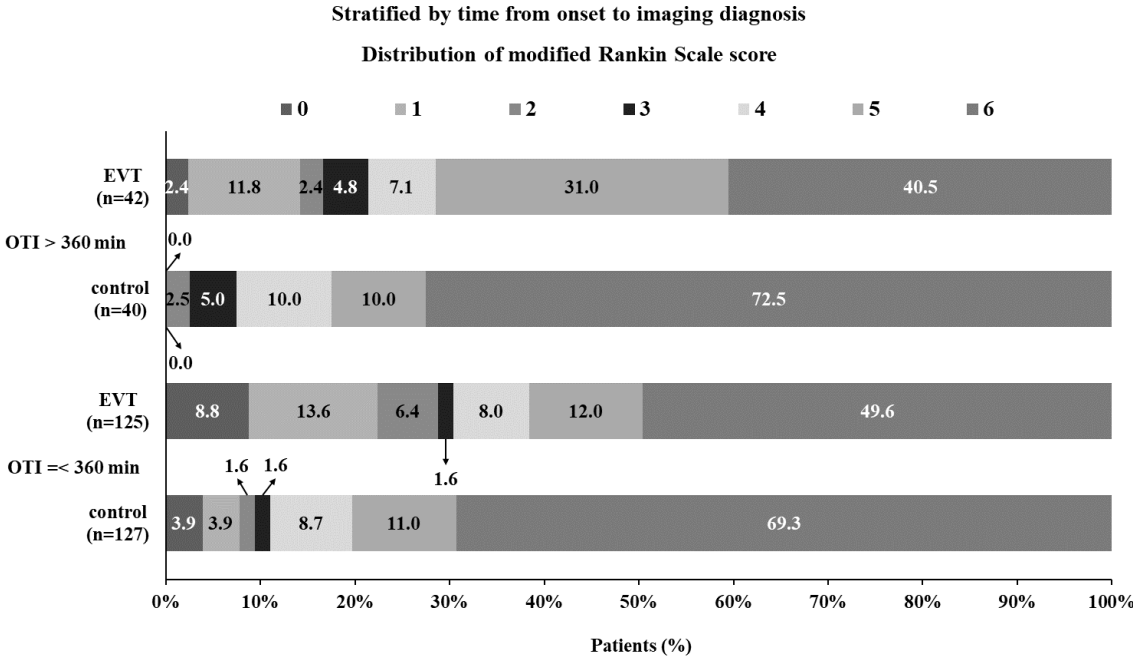

**eFigure 20.** Distribution of modified Rankin Scale score at 90 days of the patients in the PSM dataset stratified by intravenous thrombolysis (IVT).

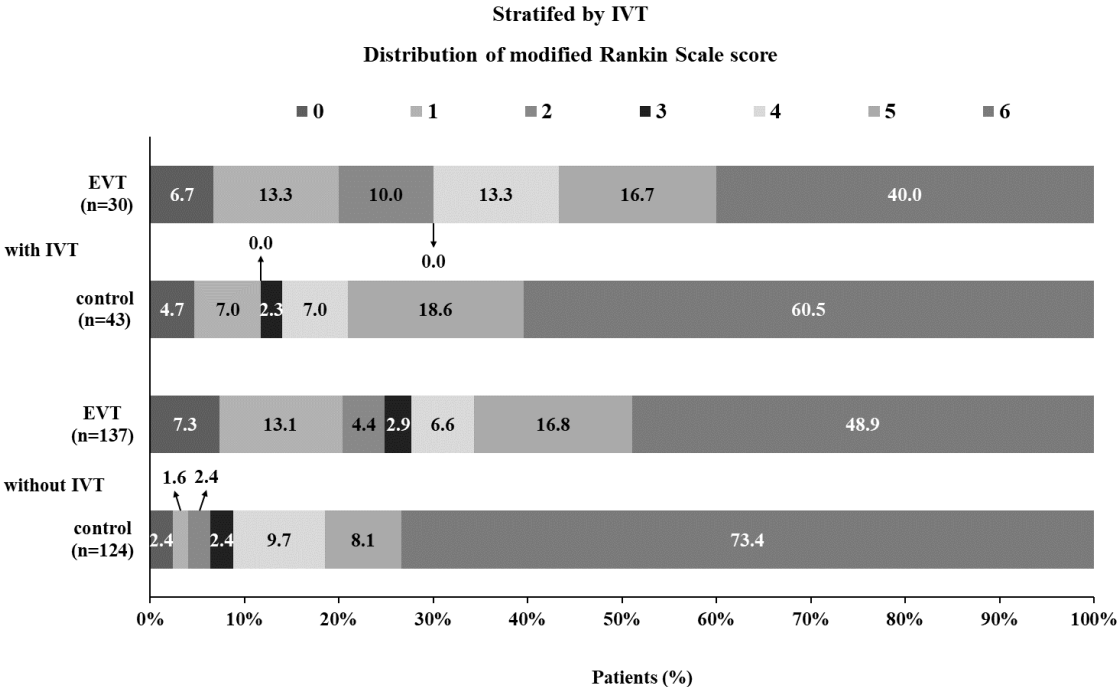

## eReferences

1. Kurth T, Walker AM, Glynn RJ, et al. Results of multivariable logistic regression, propensity matching, propensity adjustment, and propensity-based weighting under conditions of nonuniform effect. *Am J Epidemiol.* 2006;163(3):262-270.
2. Adams HP, Jr., Bendixen BH, Kappelle LJ, et al. Classification of subtype of acute ischemic stroke. Definitions for use in a multicenter clinical trial. TOAST. Trial of Org 10172 in Acute Stroke Treatment. *Stroke.* 1993;24(1):35-41.
3. Lyden PD, Hantson L. Assessment scales for the evaluation of stroke patients. *Journal of stroke and cerebrovascular diseases : the official journal of National Stroke Association.* 1998;7(2):113-127.
4. Pexman JH, Barber PA, Hill MD, et al. Use of the Alberta Stroke Program Early CT Score (ASPECTS) for assessing CT scans in patients with acute stroke. *AJNR American journal of neuroradiology.* 2001;22(8):1534-1542.
5. Hong KS, Saver JL. Quantifying the value of stroke disability outcomes: WHO global burden of disease project disability weights for each level of the modified Rankin Scale. *Stroke.* 2009;40(12):3828-3833.
6. Tomsick T, Broderick J, Carrozella J, et al. Revascularization results in the Interventional Management of Stroke II trial. *AJNR American journal of neuroradiology.* 2008;29(3):582-587.
7. von Kummer R, Broderick JP, Campbell BC, et al. The Heidelberg Bleeding Classification: Classification of Bleeding Events After Ischemic Stroke and Reperfusion Therapy. *Stroke.* 2015;46(10):2981-2986.
8. Higashida RT, Furlan AJ, Roberts H, et al. Trial design and reporting standards for intra-arterial cerebral thrombolysis for acute ischemic stroke. *Stroke; a journal of cerebral circulation.* 2003;34(8):e109-137.
9. Alemseged F, Shah DG, Diomedi M, et al. The Basilar Artery on Computed Tomography Angiography Prognostic Score for Basilar Artery Occlusion. *Stroke.* 2017;48(3):631-637.
10. van der Hoeven EJ, McVerry F, Vos JA, et al. Collateral flow predicts outcome after basilar artery occlusion: The posterior circulation collateral score. *Int J Stroke.* 2016;11(7):768-775.
11. Almekhlafi MA, Mishra S, Desai JA, et al. Not all "successful" angiographic reperfusion patients are an equal validation of a modified TICI scoring system. *Interv Neuroradiol.* 2014;20(1):21-27.
